# Supplementary material for: Versatile synthesis of functionalized β- and γ-carbolines via Pd-catalyzed C–H addition to nitriles/cyclization sequences
Source: Royal Society of Chemistry journal article supplement (doi:10.1039/c8cc00040a), 2018-01-01
Supplement: c8cc00040a1.pdf [file c8cc00040a1.pdf]

## Supporting Information

# Versatile Synthesis of Functionalized $\beta$ and $\gamma$ -Carbolines *via* Pd-Catalyzed C-H Addition to Nitriles/Cyclization Sequences

## Table of Contents

### I. General Information

### II. Reaction Condition Screening

### III. Preparation of Substrates

### IV. General Procedure and Experimental Details of Pd-Catalyzed Addition /Cyclization Sequences

### V. References

### VI. Crystal Data and Structure Refinement

### VII. $^1\text{H}$ and $^{13}\text{C}$ NMR Spectral Copies

## I. General Information

All reactions were carried out under inert atmospheric condition unless otherwise noted, and solvents were dried according to established procedures. Reactions were monitored by thin layer chromatography (TLC) visualizing with ultraviolet light (UV),  $\text{KMnO}_4$ , p-anisaldehyde stain, and phosphomolybdic acid (PMA) stain; column chromatography purifications were carried out using silica gel. Proton nuclear magnetic resonance ( $^1\text{H}$  NMR) spectra were recorded on a 300 or 500 MHz spectrometer in  $\text{CDCl}_3$ , and carbon nuclear magnetic resonance ( $^{13}\text{C}$  NMR) spectra were recorded on 125 MHz spectrometer in  $\text{CDCl}_3$  unless otherwise noted. Chemical shifts for protons are reported in parts per million downfield from tetramethylsilane (TMS) and are referenced to residual protium in the NMR solvent ( $\text{CHCl}_3 = \delta$  7.26 ppm). Chemical shifts for carbon are reported in parts per million downfield from tetramethylsilane (TMS) and are referenced to the carbon resonances of the solvent residual peak ( $\text{CDCl}_3 = \delta$  77.16 ppm). NMR data are presented as follows: chemical shift ( $\delta$  ppm), multiplicity (s = singlet, d = doublet, t = triplet, q = quartet, m = multiplet, br = broad), coupling constant in Hertz (Hz), integration. Mass spectra were recorded on the Bruker MicrOTOF Q II.

## II. Reaction Condition Screening

**Table S1. Optimization of the Reaction Conditions<sup>a</sup>**

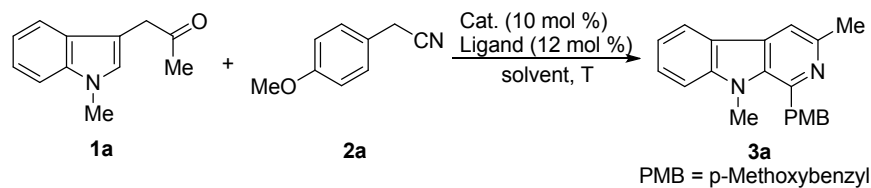

| Entry              | Cat.                  | Ligand | Solvent              | T<br>(°C) | t (h) | Yield<br>(%) <sup>b</sup> | Conv.(%) <sup>c</sup> |
|--------------------|-----------------------|--------|----------------------|-----------|-------|---------------------------|-----------------------|
| 1                  | Pd(OAc) <sub>2</sub>  | bpy    | NMA/HOAc=3:1         | 120       | 28    | nr                        | -                     |
| 2                  | Pd(OAc) <sub>2</sub>  | bpy    | NMA                  | 120       | 28    | nr                        | -                     |
| 3                  | Pd(OAc) <sub>2</sub>  | bpy    | HOAc                 | 120       | 28    | 26                        | 28                    |
| 4                  | Pd(OAc) <sub>2</sub>  | phen   | HOAc                 | 120       | 28    | 28                        | 80                    |
| 5                  | Pd(OAc) <sub>2</sub>  | L-1    | HOAc                 | 120       | 28    | 29                        | 40                    |
| 6                  | Pd(OAc) <sub>2</sub>  | L-2    | HOAc                 | 120       | 28    | 24                        | 28                    |
| 7                  | Pd(OAc) <sub>2</sub>  | L-3    | HOAc                 | 120       | 28    | < 1                       | -                     |
| 8                  | Pd(OAc) <sub>2</sub>  | -      | HOAc                 | 120       | 28    | < 1                       | 90                    |
| 9                  | Pd(acac) <sub>2</sub> | bpy    | HOAc                 | 120       | 28    | 30                        | 50                    |
| 10                 | PdCl <sub>2</sub>     | bpy    | HOAc                 | 120       | 28    | nr                        | -                     |
| 11                 | Pd(TFA) <sub>2</sub>  | bpy    | HOAc                 | 120       | 28    | 26                        | 63                    |
| 12                 | Pd(OAc) <sub>2</sub>  | bpy    | THF/HOAc=3/1         | 120       | 28    | 39                        | 42                    |
| 13                 | Pd(OAc) <sub>2</sub>  | bpy    | DMF/HOAc=3:1         | 120       | 28    | 12                        | 13                    |
| 14                 | Pd(OAc) <sub>2</sub>  | bpy    | dioxane/HOAc=3/1     | 120       | 28    | 16                        | 28                    |
| 15                 | Pd(OAc) <sub>2</sub>  | bpy    | DCE/HOAc=3/1         | 120       | 28    | 30                        | 84                    |
| 16                 | Pd(OAc) <sub>2</sub>  | bpy    | TBME/HOAc=3/1        | 120       | 28    | nr                        | -                     |
| 17                 | Pd(OAc) <sub>2</sub>  | bpy    | Toluene/HOAc=3/<br>1 | 120       | 28    | 20                        | 25                    |
| 18                 | Pd(OAc) <sub>2</sub>  | bpy    | THF/HOAc=1/1         | 120       | 28    | 38                        | 42                    |
| 19 <sup>d</sup>    | Pd(OAc) <sub>2</sub>  | bpy    | THF                  | 120       | 28    | 4                         | 6                     |
| 20 <sup>e</sup>    | Pd(OAc) <sub>2</sub>  | bpy    | THF/HOAc=3/1         | 120       | 28    | < 1                       | >95                   |
| 21 <sup>f</sup>    | Pd(OAc) <sub>2</sub>  | bpy    | THF/HOAc=3/1         | 120       | 28    | 37                        | 50                    |
| 22 <sup>g</sup>    | Pd(OAc) <sub>2</sub>  | bpy    | THF/HOAc=3/1         | 120       | 10    | < 1                       | >95                   |
| 23                 | Pd(OAc) <sub>2</sub>  | bpy    | THF/HFIP=3/1         | 120       | 28    | 31                        | 80                    |
| 24                 | Pd(OAc) <sub>2</sub>  | bpy    | THF/HOAc=3/1         | 140       | 28    | 45                        | 54                    |
| 25                 | Pd(OAc) <sub>2</sub>  | bpy    | THF/HOAc=3/1         | 120       | 48    | 57                        | 68                    |
| 26 <sup>h</sup>    | Pd(OAc) <sub>2</sub>  | bpy    | THF/HOAc=3/1         | 140       | 48    | 54                        | 74                    |
| 27 <sup>h, i</sup> | Pd(OAc) <sub>2</sub>  | bpy    | THF/HOAc=3/1         | 140       | 48    | 50                        | 71                    |

<sup>a</sup> Reaction conditions: **1a** (0.2 mmol), **2a** (0.3 mmol), catalyst (10 mol %) and ligand (12 mol %) in solvent (C = 0.4 M). <sup>b</sup> Isolated yields.

<sup>c</sup> Based on recovered starting material **1a**. <sup>d</sup> HOAc (300 mol%) was added. <sup>e</sup> D-CSA (300 mol %) was added. <sup>f</sup> TFA (300 mol %) was added. <sup>g</sup> AgSbF<sub>6</sub> (30 mol %) was added. <sup>h</sup> **2a** (3 equiv.). <sup>i</sup> C = 0.8 M.

bpy: 2,2'-bipyridine; phen: 1,10-phenanthroline; L-1: 4,4'-Dimethyl-2,2'-bipyridyl; L-2: 5,5'-Dimethyl-2,2'-bipyridyl; L-3: 6,6'-Dimethyl-2,2'-bipyridyl; D-CSA: D-(+)-camphorsulfonic acid; NMA: N-methylacetamide



### III. Preparation of Substrates

1)

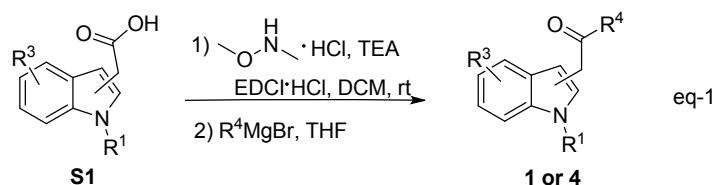

To a solution of **S1** (1 equiv.), Et<sub>3</sub>N (2.8 equiv.) and N, O-dimethylhydroxylamine hydrochloride (1.1 equiv.) in DCM was added EDCI (1.2 equiv.).<sup>1</sup> The resultant mixture was stirred at rt for 24 h before being quenched with water. The mixture was extracted with DCM, and the combined organic phases were washed with HCl (1 M) and brine, dried over Na<sub>2</sub>SO<sub>4</sub>, and concentrated. The residue was purified by flash column chromatography on a silica gel using petroleum ether/EtOAc (3:1) as the eluent to give amide. To a solution of amide (1 equiv.) in dry THF was added CH<sub>3</sub>MgBr (1.0 equiv., 1.0 M in THF) or EtMgBr (1.0 equiv., 1.0 M in THF) dropwise at 0 °C. Then, the reaction mixture was stirred at rt for 2 h. After completion, the reaction was quenched with saturated ammonium chloride solution at 0 °C, and extracted with EtOAc. The combined organic phases were washed with brine dried over Na<sub>2</sub>SO<sub>4</sub>, and concentrated. The residue was purified by flash column chromatography on a silica gel using petroleum ether/EtOAc as the eluent to give the desired products **1a-1f** or **4a**.

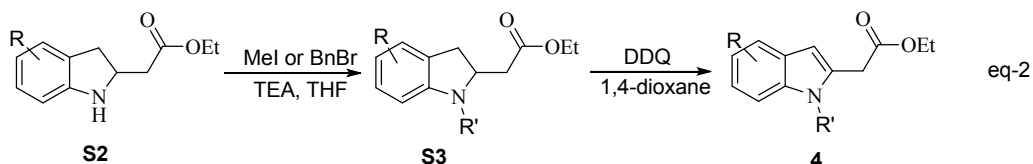

To a solution of **S2**<sup>2,3</sup> (1 equiv.) in THF was added Et<sub>3</sub>N (2 equiv.), methyl iodide (1.5 equiv.) or benzyl bromide (1.5 equiv.), and allowed to reflux for 20 h. The reaction was quenched with saturated aqueous ammonium chloride, and diluted with EtOAc, and brine, dried over Na<sub>2</sub>SO<sub>4</sub>, and concentrated. The residue was purified by flash column chromatography on a silica gel using petroleum ether/EtOAc as the eluent to give **S3**. To a solution of **S3** (1 equiv.) in 1, 4-dioxane was added DDQ (1 equiv.) at rt.<sup>4</sup> After completion, the reaction was quenched with saturated aqueous solution of NaHCO<sub>3</sub>, and extracted three times with EtOAc. The combined organics were washed with brine, dried over Na<sub>2</sub>SO<sub>4</sub>, and concentrated. The residue was purified by flash column chromatography on a silica gel using petroleum ether/EtOAc (30:1) as the eluent to give the desired product **4b-4g**.

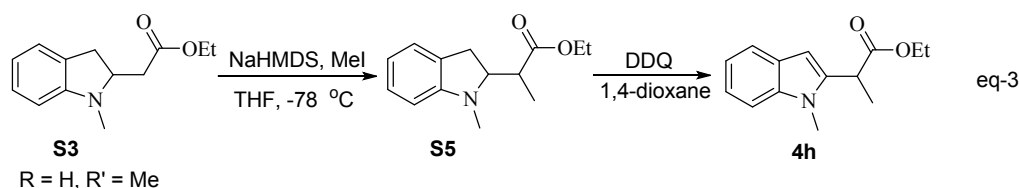

To a solution of **S3** (1 equiv.) in anhydrous THF was added NaHMDS (2 equiv., 1.0 M in THF) slowly at  $-78^\circ\text{C}$ .<sup>5</sup> Stirring was continued for 1 h at  $-78^\circ\text{C}$ . MeI (2 equiv.) was added. The mixture was stirred for 30 minutes at rt, and quenched with saturated aqueous ammonium chloride and partitioned between water and dichloromethane. The aqueous phase was extracted with dichloromethane, and the combined organic phases were dried over  $\text{Na}_2\text{SO}_4$  and concentrated. The residue was purified by flash column chromatography on a silica gel using petroleum ether/EtOAc (30:1) as the eluent to give the desired product **S5**. Compound **4h** was prepared according to the procedure of eq-2 (from **S3** to **4**).

### 1-(1-Methyl-1H-indol-3-yl)propan-2-one

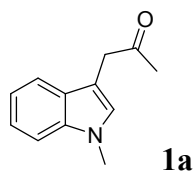

Yellow oil.  $^1\text{H}$  NMR (500 MHz,  $\text{CDCl}_3$ )  $\delta$  7.52 (d,  $J = 7.9$  Hz, 1H), 7.29 (d,  $J = 8.2$  Hz, 1H), 7.24-7.21 (m, 1H), 7.12 (t,  $J = 7.4$  Hz, 1H), 6.98 (s, 1H), 3.78 (s, 2H), 3.74 (s, 3H), 2.15 (s, 3H).  $^{13}\text{C}$  NMR (125 MHz,  $\text{CDCl}_3$ )  $\delta$  207.45, 137.07, 127.93, 127.81, 121.94, 119.37, 118.86, 109.45, 107.22, 40.78, 32.79, 28.95.

### 1-(1-Benzyl-1H-indol-3-yl)propan-2-one

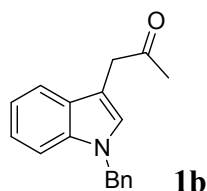

Yellow solid, mp:  $50\text{--}52^\circ\text{C}$ .  $^1\text{H}$  NMR (500 MHz,  $\text{CDCl}_3$ )  $\delta$  7.54 (d,  $J = 7.9$  Hz, 1H), 7.32 – 7.22 (m, 4H), 7.17 (t,  $J = 7.1$  Hz, 1H), 7.12 (d,  $J = 7.1$  Hz, 1H), 7.09 (t,  $J = 5.5$  Hz, 2H), 7.04 (s, 1H), 5.25 (s, 2H), 3.78 (s, 2H), 2.15 (s, 3H).  $^{13}\text{C}$  NMR (125 MHz,  $\text{CDCl}_3$ )  $\delta$  207.33, 137.47, 136.71, 128.85, 128.06, 127.73, 127.29, 126.89, 122.16, 119.65, 119.00, 109.93, 108.03, 50.05, 40.84, 28.93. HRMS (ESI): calcd. for  $\text{C}_{18}\text{H}_{18}\text{NO}^+$  ( $[\text{M}+\text{H}]^+$ ): 264.1383, found 264.1388.

### 1-(1H-indol-3-yl)propan-2-one

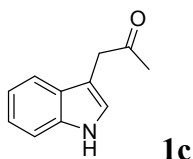

Yellow solid, mp: 150-152 °C. <sup>1</sup>H NMR (500 MHz, CDCl<sub>3</sub>) δ 8.22 (s, 1H), 7.53 (d, *J* = 7.9 Hz, 1H), 7.33 (d, *J* = 8.1 Hz, 1H), 7.20 (t, *J* = 7.5 Hz, 1H), 7.13 (t, *J* = 7.5 Hz, 1H), 7.06 (s, 1H), 3.81 (s, 2H), 2.16 (s, 3H). <sup>13</sup>C NMR (125 MHz, CDCl<sub>3</sub>) δ 207.72, 136.31, 127.35, 123.34, 122.38, 119.88, 118.75, 111.43, 108.76, 40.92, 29.02.

### 1-(1-Methyl-1H-indol-3-yl)butan-2-one

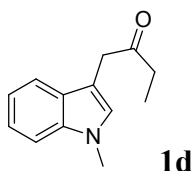

Yellow oil. <sup>1</sup>H NMR (500 MHz, CDCl<sub>3</sub>) δ 7.52 (d, *J* = 7.9 Hz, 1H), 7.27 (d, *J* = 8.2 Hz, 1H), 7.21 (t, *J* = 7.1 Hz, 1H), 7.11 (t, *J* = 7.4 Hz, 1H), 6.95 (s, 1H), 3.76 (s, 2H), 3.71 (s, 3H), 2.48 (q, *J* = 7.3 Hz, 2H), 1.00 (t, *J* = 7.3 Hz, 3H). <sup>13</sup>C NMR (125 MHz, CDCl<sub>3</sub>) δ 209.96, 137.00, 127.86, 127.83, 121.83, 119.27, 118.85, 109.38, 107.36, 39.51, 34.65, 32.70, 7.93. HRMS (ESI): calcd. for C<sub>13</sub>H<sub>16</sub>NO<sup>+</sup> ([M+H]<sup>+</sup>): 202.1226, found 202.1229.

### 1-(5-Methoxy-1-methyl-1H-indol-3-yl)propan-2-one

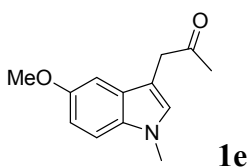

Yellow solid, mp: 45-47 °C. <sup>1</sup>H NMR (500 MHz, CDCl<sub>3</sub>) δ 7.18 (d, *J* = 8.8 Hz, 1H), 6.95 (d, *J* = 2.1 Hz, 2H), 6.89 (d, *J* = 8.8 Hz, 1H), 3.84 (s, 3H), 3.75 (s, 2H), 3.72 (s, 3H), 2.15 (s, 3H). <sup>13</sup>C NMR (125 MHz, CDCl<sub>3</sub>) δ 207.55, 154.20, 132.46, 128.48, 128.10, 112.24, 110.26, 106.67, 100.63, 56.03, 40.92, 32.95, 28.87. HRMS (ESI): calcd. for C<sub>13</sub>H<sub>16</sub>NO<sub>2</sub><sup>+</sup> ([M+H]<sup>+</sup>): 218.1176, found 218.1182.

### 1-(5-Chloro-1-methyl-1H-indol-3-yl)propan-2-one

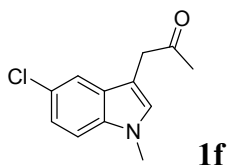

Yellow solid, mp: 48-50 °C. <sup>1</sup>H NMR (500 MHz, CDCl<sub>3</sub>) δ 7.47 (d, *J* = 1.5 Hz, 1H), 7.19-7.14 (m, 2H), 7.01 (s, 1H), 3.75 (s, 2H), 3.74 (s, 3H), 2.18 (s, 3H). <sup>13</sup>C NMR (125 MHz, CDCl<sub>3</sub>) δ 206.82, 135.45, 129.29, 128.81, 125.26, 122.19, 118.32, 110.54, 106.86, 40.40, 32.97, 29.10. HRMS (ESI): calcd. for C<sub>12</sub>H<sub>13</sub>ClNO<sup>+</sup> ([M+H]<sup>+</sup>): 222.0680, found 222.0683.

### Ethyl 2-(1-methyl-1H-indol-3-yl)acetate

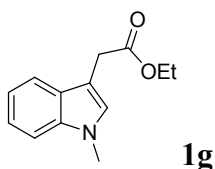

Compound **1g** was prepared according to the known procedure.<sup>6, 7</sup> Yellow oil. <sup>1</sup>H NMR (500 MHz, CDCl<sub>3</sub>) δ 7.61 (d, *J* = 7.9 Hz, 1H), 7.29 (d, *J* = 8.2 Hz, 1H), 7.22 (t, *J* = 7.9 Hz, 1H), 7.12 (t, *J* = 7.5 Hz, 1H), 7.04 (s, 1H), 4.16 (q, *J* = 7.1 Hz, 2H), 3.75-3.74 (m, 5H), 1.26 (t, *J* = 7.1 Hz, 3H). <sup>13</sup>C NMR (125 MHz, CDCl<sub>3</sub>) δ 172.27, 137.03, 127.83, 121.85, 119.23, 119.15, 109.37, 107.07, 60.88, 32.82, 31.46, 14.38.

### 1-(1-Methyl-1H-indol-2-yl)propan-2-one

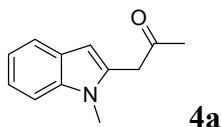

Yellow oil. <sup>1</sup>H NMR (500 MHz, CDCl<sub>3</sub>) δ 7.56 (d, *J* = 7.8 Hz, 1H), 7.27 (d, *J* = 8.2 Hz, 1H), 7.19 (t, *J* = 7.6 Hz, 1H), 7.09 (t, *J* = 7.4 Hz, 1H), 6.38 (s, 1H), 3.83 (s, 2H), 3.60 (s, 3H), 2.16 (s, 3H). <sup>13</sup>C NMR (125 MHz, CDCl<sub>3</sub>) δ 205.09, 137.85, 133.14, 127.79, 121.54, 120.33, 119.74, 109.28, 102.08, 43.00, 29.90, 29.02. HRMS (ESI): calcd. for C<sub>12</sub>H<sub>14</sub>NO<sup>+</sup> ([M+H]<sup>+</sup>): 188.1070, found 188.1078.

### Ethyl 2-(1-methyl-1H-indol-2-yl)acetate



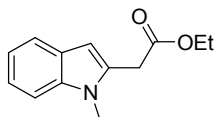

**4b**

Yellow solid, mp: 49-51 °C. <sup>1</sup>H NMR (500 MHz, CDCl<sub>3</sub>) δ 7.55 (d, *J* = 7.8 Hz, 1H), 7.28 (d, *J* = 8.2 Hz, 1H), 7.19 (t, *J* = 7.6 Hz, 1H), 7.08 (t, *J* = 7.4 Hz, 1H), 6.41 (s, 1H), 4.17 (q, *J* = 7.1 Hz, 2H), 3.81 (s, 2H), 3.70 (s, 3H), 1.26 (t, *J* = 7.1 Hz, 3H). <sup>13</sup>C NMR (125 MHz, CDCl<sub>3</sub>) δ 169.77, 138.17, 133.59, 127.41, 126.17, 121.19, 120.24, 109.33, 102.08, 61.46, 33.39, 30.08, 14.27.

#### Ethyl 2-(1-benzyl-1H-indol-2-yl)acetate

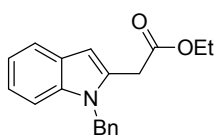

**4c**

Yellow solid, mp: 88-82 °C. <sup>1</sup>H NMR (500 MHz, CDCl<sub>3</sub>) δ 7.60 (d, *J* = 7.7 Hz, 1H), 7.32 – 7.18 (m, 4H), 7.13 (t, *J* = 7.6 Hz, 1H), 7.09 (t, *J* = 6.9 Hz, 1H), 6.94 (d, *J* = 7.1 Hz, 2H), 6.51 (s, 1H), 5.39 (s, 2H), 4.05 (q, *J* = 7.1 Hz, 2H), 3.71 (s, 2H), 1.19 (t, *J* = 7.1 Hz, 3H). <sup>13</sup>C NMR (125 MHz, CDCl<sub>3</sub>) δ 169.96, 137.70, 137.64, 132.75, 128.88, 127.94, 127.47, 126.08, 121.80, 120.54, 119.92, 109.77, 102.90, 61.37, 46.87, 33.60, 14.20. HRMS (ESI): calcd. for C<sub>19</sub>H<sub>20</sub>NO<sub>2</sub><sup>+</sup> ([M+H]<sup>+</sup>): 294.1489, found 294.1497.

#### Ethyl 2-(1H-indol-2-yl)acetate

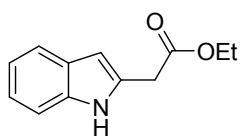

**4d**

Yellow oil. <sup>1</sup>H NMR (500 MHz, CDCl<sub>3</sub>) δ 8.69 (s, 1H), 7.55 (d, *J* = 7.8 Hz, 1H), 7.34 (d, *J* = 8.1 Hz, 1H), 7.15 (t, *J* = 7.6 Hz, 1H), 7.08 (t, *J* = 7.4 Hz, 1H), 6.35 (s, 1H), 4.21 (q, *J* = 7.1 Hz, 2H), 3.82 (s, 2H), 1.29 (t, *J* = 7.1 Hz, 3H). <sup>13</sup>C NMR (125 MHz, CDCl<sub>3</sub>) δ 170.74, 136.44, 130.71, 128.32, 121.81, 120.22, 119.91, 110.92, 101.90, 61.50, 34.07, 14.27.

#### Ethyl 2-(5-methoxy-1H-indol-2-yl)acetate

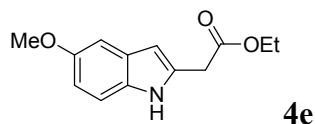

Yellow oil.  $^1\text{H}$  NMR (500 MHz,  $\text{CDCl}_3$ )  $\delta$  8.58 (s, 1H), 7.19 (d,  $J = 8.5$  Hz, 1H), 7.01 (s, 1H), 6.80 (d,  $J = 8.5$  Hz, 1H), 6.26 (s, 1H), 4.19 (q,  $J = 7.1$  Hz, 2H), 3.82 (s, 3H), 3.77 (s, 2H), 1.27 (t,  $J = 6.9$  Hz, 3H).  $^{13}\text{C}$  NMR (125 MHz,  $\text{CDCl}_3$ )  $\delta$  170.71, 154.27, 131.59, 131.43, 128.76, 111.83, 111.59, 102.17, 101.71, 61.45, 55.94, 34.09, 14.24.

#### Ethyl 2-(5-chloro-1H-indol-2-yl)acetate

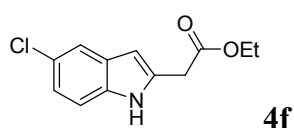

Yellow oil.  $^1\text{H}$  NMR (500 MHz,  $\text{CDCl}_3$ )  $\delta$  8.79 (s, 1H), 7.49 (s, 1H), 7.23 (d,  $J = 8.6$  Hz, 1H), 7.09 (dd,  $J = 8.6, 2.0$  Hz, 1H), 6.28 (s, 1H), 4.21 (q,  $J = 7.2$  Hz, 2H), 3.81 (s, 2H), 1.30 (t,  $J = 7.1$  Hz, 3H).  $^{13}\text{C}$  NMR (125 MHz,  $\text{CDCl}_3$ )  $\delta$  170.63, 134.75, 132.24, 129.38, 125.54, 122.08, 119.63, 111.90, 101.59, 61.65, 33.87, 14.28.

#### Ethyl 2-(6-chloro-1H-indol-2-yl)acetate

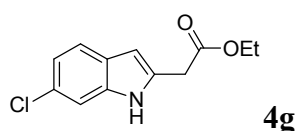

Yellow oil.  $^1\text{H}$  NMR (500 MHz,  $\text{CDCl}_3$ )  $\delta$  8.74 (s, 1H), 7.43 (d,  $J = 8.4$  Hz, 1H), 7.30 (s, 1H), 7.04 (d,  $J = 6.7$  Hz, 1H), 6.31 (s, 1H), 4.21 (q,  $J = 7.1$  Hz, 2H), 3.80 (s, 2H), 1.29 (t,  $J = 7.1$  Hz, 3H).  $^{13}\text{C}$  NMR (125 MHz,  $\text{CDCl}_3$ )  $\delta$  170.65, 136.76, 131.51, 127.61, 126.87, 121.03, 120.63, 110.90, 101.96, 61.64, 33.91, 14.28.

#### Ethyl 2-(1-methyl-1H-indol-2-yl)propanoate

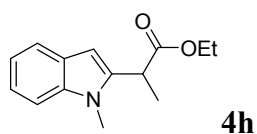

Yellow oil.  $^1\text{H}$  NMR (500 MHz,  $\text{CDCl}_3$ )  $\delta$  7.56 (d,  $J = 7.8$  Hz, 1H), 7.28 (d,  $J = 8.2$  Hz, 1H), 7.19 (t,  $J = 7.2$  Hz, 1H), 7.08 (t,  $J = 7.4$  Hz, 1H), 6.42 (s, 1H), 4.23 – 4.05 (m, 2H), 3.93 (q,  $J = 7.1$  Hz, 1H), 3.71 (s, 3H), 1.64 (d,  $J = 7.2$  Hz, 3H), 1.22 (t,  $J = 7.1$  Hz, 3H).  $^{13}\text{C}$  NMR (125 MHz,  $\text{CDCl}_3$ )  $\delta$  173.19, 139.14, 137.66, 127.65, 121.45, 120.49, 119.60, 109.15, 99.55, 61.30, 38.06, 29.92, 16.99, 14.25. HRMS (ESI): calcd. for  $\text{C}_{14}\text{H}_{18}\text{NO}_2^+$  ( $[\text{M}+\text{H}]^+$ ): 232.1332, found 232.1330.

#### IV. General Procedure and Experimental Details of Pd-Catalyzed Addition/Cyclization Sequences

##### 1) General Procedure and Experimental Details of the Preparation of $\beta$ -Carbolines

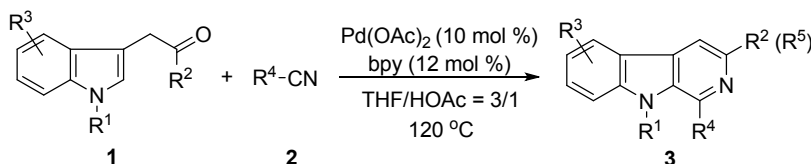

Compound **1** (0.4 mmol), nitrile **2** (0.6 mmol),  $\text{Pd(OAc)}_2$  (10 mol %), 2,2'-bipyridine (12 mol %) and HOAc/THF ( $v/v = 1/3$ , 1 mL) were placed in a sealed tube under nitrogen atmosphere. The mixture was stirred at 120 °C for the desired time. Upon completion, the mixture was cooled to room temperature, and then  $\text{NaHCO}_3$  was added until no bubbles were generated. The resulting mixture was extracted with DCM three times. The combined organic layers were dried over  $\text{Na}_2\text{SO}_4$ , filtered, and concentrated under reduced pressure. The residue was purified by flash column chromatography on a silica gel using petroleum ether/EtOAc as the eluent to give the desired product **3**.

##### For the preparation of **3q**:

Compound **1a** (0.4 mmol), acetonitrile (0.6 mmol),  $\text{Pd(OAc)}_2$  (10 mol %), 2,2'-bipyridine (12 mol %) and HOAc/THF ( $v/v = 1/3$ , 1 mL) were placed in a sealed tube under nitrogen atmosphere. The mixture was stirred at 120 °C for the desired time. Upon completion, the mixture was cooled to 0 °C, then excess  $\text{Et}_3\text{N}$  and acetyl chloride (0.88 mmol) were added at the same temperature. After completion, the mixture was extracted with DCM three times. The combined organic layers were dried over  $\text{Na}_2\text{SO}_4$ , filtered, and concentrated under reduced pressure. The residue was purified by flash column chromatography on a silica gel using petroleum ether/EtOAc as the eluent to give the desired product **3q**.

### 1-(4-Methoxybenzyl)-3,9-dimethyl-9H-pyrido[3,4-b]indole

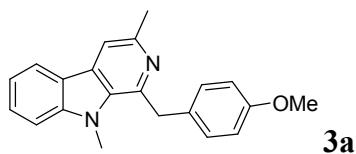

White solid (72 mg, 57%), mp: 110-111 °C. <sup>1</sup>H NMR (500 MHz, CDCl<sub>3</sub>) δ 8.13 (d, *J* = 7.8 Hz, 1H), 7.81 (s, 1H), 7.57 (t, *J* = 7.6 Hz, 1H), 7.35 (d, *J* = 8.4 Hz, 1H), 7.28 (d, *J* = 7.6 Hz, 1H), 7.22 (d, *J* = 7.5 Hz, 1H), 7.09 (t, *J* = 7.3 Hz, 1H), 6.93 (t, *J* = 7.5 Hz, 1H), 6.43 (d, *J* = 7.6 Hz, 1H), 4.67 (s, 2H), 3.73 (s, 3H), 2.76 (s, 3H), 2.50 (s, 3H). <sup>13</sup>C NMR (125 MHz, CDCl<sub>3</sub>) δ 146.77, 142.60, 141.74, 138.71, 135.55, 134.84, 130.60, 130.01, 128.26, 127.75, 126.34, 126.31, 121.48, 121.11, 119.42, 112.41, 109.45, 39.89, 31.29, 24.21, 19.99. HRMS (ESI): calcd. for C<sub>21</sub>H<sub>21</sub>N<sub>2</sub>O<sup>+</sup> ([M+H]<sup>+</sup>): 317.1648, found 317.1642.

### 9-Benzyl-1-(4-methoxybenzyl)-3-methyl-9H-pyrido[3,4-b]indole

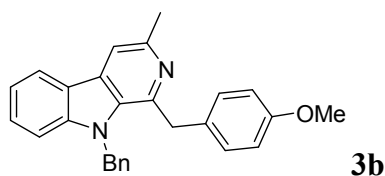

White solid (53 mg, 34%), mp: 117-118 °C. <sup>1</sup>H NMR (500 MHz, CDCl<sub>3</sub>) δ 8.13 (d, *J* = 7.5 Hz, 1H), 7.81 (s, 1H), 7.45 (t, *J* = 7.3 Hz, 1H), 7.35 – 7.22 (m, 5H), 6.92 (d, *J* = 8.5 Hz, 2H), 6.88 (d, *J* = 6.5 Hz, 2H), 6.76 (d, *J* = 8.7 Hz, 2H), 5.43 (s, 2H), 4.33 (s, 2H), 3.72 (s, 2H), 2.75 (s, 3H). <sup>13</sup>C NMR (125 MHz, CDCl<sub>3</sub>) δ 158.15, 147.01, 142.43, 142.21, 138.41, 134.19, 132.50, 131.14, 129.07, 128.84, 128.50, 127.43, 125.22, 121.49, 121.36, 119.85, 114.20, 112.45, 109.79, 55.28, 47.80, 40.87, 24.30. HRMS (ESI): calcd. for C<sub>27</sub>H<sub>25</sub>N<sub>2</sub>O<sup>+</sup> ([M+H]<sup>+</sup>): 393.1961, found 393.1958.

### 1-(4-Methoxybenzyl)-3-methyl-9H-pyrido[3,4-b]indole

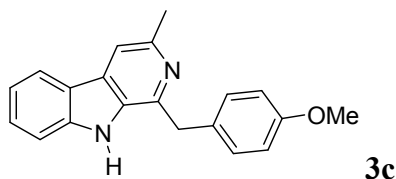

White solid (69 mg, 57%), mp: 108-110 °C. <sup>1</sup>H NMR (500 MHz, CDCl<sub>3</sub>) δ 8.38 (s, 1H), 8.03 (d, *J* = 7.8 Hz, 1H), 7.68 (s, 1H), 7.42 (t, *J* = 7.5 Hz, 1H), 7.29 (d, *J* = 8.1 Hz, 1H), 7.19 (t, *J* = 7.4 Hz, 1H),

7.13 (d,  $J = 8.0$  Hz, 2H), 6.75 (d,  $J = 8.1$  Hz, 2H), 4.39 (s, 2H), 3.71 (s, 3H), 2.70 (s, 3H).  $^{13}\text{C}$  NMR (125 MHz,  $\text{CDCl}_3$ )  $\delta$  158.41, 146.86, 143.20, 140.83, 133.06, 130.54, 130.51, 129.78, 128.22, 121.67, 121.60, 119.82, 114.30, 112.38, 111.69, 55.31, 40.73, 24.13. HRMS (ESI): calcd. for  $\text{C}_{20}\text{H}_{19}\text{N}_2\text{O}^+$  ( $[\text{M}+\text{H}]^+$ ): 303.1492, found 303.1491.

### 3-Ethyl-1-(4-methoxybenzyl)-9-methyl-9H-pyrido[3,4-b]indole

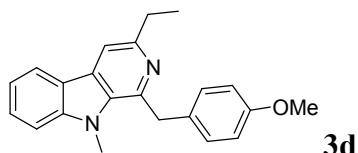

White solid (76 mg, 56%), mp: 110-111 °C.  $^1\text{H}$  NMR (500 MHz,  $\text{CDCl}_3$ )  $\delta$  8.19 (d,  $J = 7.9$  Hz, 1H), 7.96 (s, 1H), 7.69 (t,  $J = 7.3$  Hz, 1H), 7.45 (d,  $J = 8.4$  Hz, 1H), 7.36 (t,  $J = 7.3$  Hz, 1H), 7.02 (d,  $J = 8.3$  Hz, 2H), 6.80 (d,  $J = 8.4$  Hz, 2H), 4.96 (s, 2H), 3.96 (s, 3H), 3.74 (s, 3H), 3.30-3.20 (m, 2H), 1.48 (t,  $J = 7.5$  Hz, 3H).  $^{13}\text{C}$  NMR (125 MHz,  $\text{CDCl}_3$ )  $\delta$  158.10, 152.26, 142.57, 142.44, 134.59, 132.55, 130.76, 129.20, 128.11, 121.38, 121.31, 119.33, 114.13, 110.81, 109.44, 55.33, 41.42, 31.98, 31.26, 15.06. HRMS (ESI): calcd. for  $\text{C}_{22}\text{H}_{23}\text{N}_2\text{O}^+$  ( $[\text{M}+\text{H}]^+$ ): 331.1805, found 331.1804.

### 6-Methoxy-1-(4-methoxybenzyl)-3,9-dimethyl-9H-pyrido[3,4-b]indole

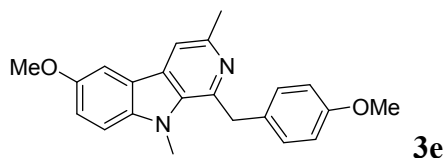

White solid (72 mg, 52%), mp: 166-167 °C.  $^1\text{H}$  NMR (500 MHz,  $\text{CDCl}_3$ )  $\delta$  7.71 (s, 1H), 7.53 (s, 1H), 7.24 – 7.19 (m, 2H), 7.00 (d,  $J = 8.3$  Hz, 2H), 6.77 (d,  $J = 8.4$  Hz, 2H), 4.67 (s, 2H), 3.92 (s, 3H), 3.83 (s, 3H), 3.74 (s, 3H), 2.73 (s, 3H).  $^{13}\text{C}$  NMR (125 MHz,  $\text{CDCl}_3$ )  $\delta$  158.13, 153.89, 145.88, 142.50, 137.85, 134.91, 132.38, 130.50, 129.19, 121.23, 118.23, 114.16, 112.29, 110.40, 103.40, 56.21, 55.34, 41.18, 32.10, 24.15. HRMS (ESI): calcd. for  $\text{C}_{22}\text{H}_{23}\text{N}_2\text{O}_2^+$  ( $[\text{M}+\text{H}]^+$ ): 347.1754, found 347.1759.

### 6-Chloro-1-(4-methoxybenzyl)-3,9-dimethyl-9H-pyrido[3,4-b]indole

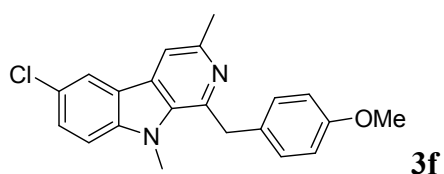

White solid (60 mg, 43%), mp: 182-183 °C. <sup>1</sup>H NMR (500 MHz, CDCl<sub>3</sub>) δ 7.96 (d, *J* = 1.4 Hz, 1H), 7.63 (s, 1H), 7.44 (dd, *J* = 8.8, 1.6 Hz, 1H), 7.19 (d, *J* = 8.8 Hz, 1H), 6.99 (d, *J* = 8.4 Hz, 2H), 6.77 (d, *J* = 8.5 Hz, 2H), 4.64 (s, 2H), 3.80 (s, 3H), 3.72 (s, 3H), 2.72 (s, 3H). <sup>13</sup>C NMR (125 MHz, CDCl<sub>3</sub>) δ 158.09, 146.65, 142.62, 140.71, 134.62, 131.98, 129.73, 129.05, 128.25, 124.76, 121.92, 120.84, 114.11, 112.29, 110.45, 55.22, 40.95, 32.01, 24.00. HRMS (ESI): calcd. for C<sub>21</sub>H<sub>20</sub>ClN<sub>2</sub>O<sup>+</sup> ([M+H]<sup>+</sup>): 351.1259, found 351.1258.

### 1-Benzyl-3,9-dimethyl-9H-pyrido[3,4-b]indole

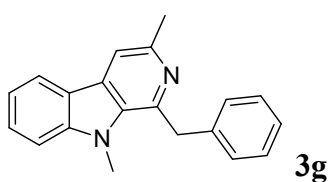

White solid (65 mg, 57%), mp: 134-135 °C. <sup>1</sup>H NMR (500 MHz, CDCl<sub>3</sub>) δ 8.09 (d, *J* = 7.8 Hz, 1H), 7.76 (s, 1H), 7.54 (t, *J* = 7.7 Hz, 1H), 7.33 (d, *J* = 8.3 Hz, 1H), 7.23 (t, *J* = 7.7 Hz, 3H), 7.16 (d, *J* = 7.3 Hz, 1H), 7.08 (d, *J* = 7.3 Hz, 2H), 4.75 (s, 2H), 3.84 (s, 3H), 2.74 (s, 3H). <sup>13</sup>C NMR (125 MHz, CDCl<sub>3</sub>) δ 146.56, 142.54, 141.86, 140.35, 134.48, 130.80, 128.69, 128.20, 126.26, 121.39, 121.06, 119.36, 112.40, 109.40, 42.09, 31.86, 24.22. HRMS (ESI): calcd. for C<sub>20</sub>H<sub>19</sub>N<sub>2</sub><sup>+</sup> ([M+H]<sup>+</sup>): 287.1543, found 287.1547.

### 3,9-Dimethyl-1-(2-methylbenzyl)-9H-pyrido[3,4-b]indole

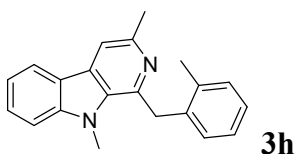

White solid (66 mg, 55%), mp: 122-123 °C. <sup>1</sup>H NMR (500 MHz, CDCl<sub>3</sub>) δ 8.13 (d, *J* = 7.8 Hz, 1H), 7.81 (s, 1H), 7.57 (t, *J* = 7.6 Hz, 1H), 7.35 (d, *J* = 8.4 Hz, 1H), 7.28 (d, *J* = 7.6 Hz, 1H), 7.22 (d, *J* = 7.5 Hz, 1H), 7.09 (t, *J* = 7.3 Hz, 1H), 6.93 (t, *J* = 7.5 Hz, 1H), 6.44 (d, *J* = 7.6 Hz, 1H), 4.67 (s, 2H), 3.73 (s, 3H), 2.76 (s, 3H), 2.47 (s, 3H). <sup>13</sup>C NMR (125 MHz, CDCl<sub>3</sub>) δ 146.77, 142.60, 141.74, 138.71, 135.55, 134.84, 130.60, 130.01, 128.26, 127.75, 126.34, 126.31, 121.48, 121.11, 119.42, 112.41, 109.45, 39.89, 31.29, 24.21, 19.99. HRMS (ESI): calcd. for C<sub>21</sub>H<sub>21</sub>N<sup>+</sup> ([M+H]<sup>+</sup>): 301.1699, found 301.1693.

### 1-(3-Chlorobenzyl)-3,9-dimethyl-9H-pyrido[3,4-b]indole

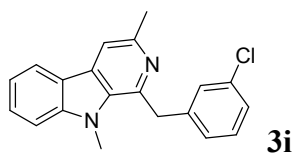

White solid (77 mg, 60%), mp: 113-114 °C. <sup>1</sup>H NMR (500 MHz, CDCl<sub>3</sub>) δ 8.08 (d, *J* = 7.8 Hz, 1H), 7.76 (s, 1H), 7.55 (t, *J* = 7.7 Hz, 1H), 7.33 (d, *J* = 8.3 Hz, 1H), 7.27-7.15 (m, 1H), 7.18-7.13 (m, 2H), 7.10 (s, 1H), 6.98-6.93 (m, 1H), 4.71 (s, 2H), 3.84 (s, 3H), 2.74 (s, 3H). <sup>13</sup>C NMR (125MHz, CDCl<sub>3</sub>) δ 146.78, 142.66, 142.47, 140.87, 134.62, 134.47, 131.10, 129.97, 128.42, 128.35, 126.62, 126.47, 121.49, 121.07, 119.55, 112.72, 109.48, 41.69, 32.00, 24.21. HRMS (ESI): calcd. for C<sub>20</sub>H<sub>18</sub>ClN<sub>2</sub><sup>+</sup> ([M+H]<sup>+</sup>): 321.1153, found 321.1152.

### 1-(4-Chlorobenzyl)-3,9-dimethyl-9H-pyrido[3,4-b]indole

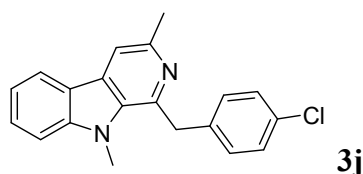

White solid (77 mg, 60%), mp: 114-115 °C. <sup>1</sup>H NMR (500 MHz, CDCl<sub>3</sub>) δ 8.07 (d, *J* = 7.7 Hz, 1H), 7.75 (s, 1H), 7.54 (t, *J* = 7.5 Hz, 1H), 7.32 (d, *J* = 8.3 Hz, 1H), 7.24 (d, *J* = 6.8 Hz, 1H), 7.19 (d, *J* = 8.3 Hz, 2H), 7.01 (d, *J* = 8.2 Hz, 2H), 4.69 (s, 2H), 3.81 (s, 3H), 2.73 (s, 3H). <sup>13</sup>C NMR (125 MHz, CDCl<sub>3</sub>) δ 146.67, 142.66, 141.23, 138.82, 134.41, 132.15, 131.08, 129.59, 128.85, 128.44, 121.48, 121.04, 119.57, 112.65, 109.48, 41.36, 31.94, 24.15. HRMS (ESI): calcd. for C<sub>20</sub>H<sub>18</sub>ClN<sub>2</sub><sup>+</sup> ([M+H]<sup>+</sup>): 321.1153, found 321.1150.

### 1-(4-Bromobenzyl)-3,9-dimethyl-9H-pyrido[3,4-b]indole

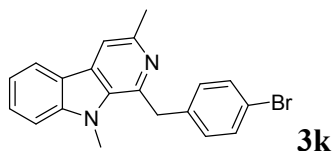

White solid (91 mg, 62%), mp: 115-116 °C. <sup>1</sup>H NMR (500 MHz, CDCl<sub>3</sub>) δ 8.07 (d, *J* = 7.8 Hz, 1H), 7.75 (s, 1H), 7.53 (t, *J* = 7.9 Hz, 1H), 7.36-7.30 (m, 3H), 7.27 – 7.21 (m, 1H), 6.96 (d, *J* = 8.3 Hz, 2H), 4.66 (s, 2H), 3.81 (s, 3H), 2.72 (s, 3H). <sup>13</sup>C NMR (125 MHz, CDCl<sub>3</sub>) δ 146.77, 142.59, 141.18, 139.42,

134.41, 131.77, 130.98, 129.98, 128.36, 121.44, 121.06, 120.18, 119.51, 112.59, 109.45, 41.56, 31.94, 24.25. HRMS (ESI): calcd. for  $C_{20}H_{18}BrN_2^+$  ( $[M+H]^+$ ): 365.0648, found 365.0651.

### 1-(3,4-Dichlorobenzyl)-3,9-dimethyl-9H-pyrido[3,4-b]indole

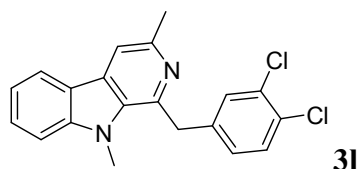

White solid (85 mg, 60%), mp: 134-135 °C.  $^1H$  NMR (500 MHz,  $CDCl_3$ )  $\delta$  8.08 (d,  $J = 7.6$  Hz, 1H), 7.77 (s, 1H), 7.57 (t,  $J = 7.4$  Hz, 1H), 7.34 (d,  $J = 8.2$  Hz, 1H), 7.29 (d,  $J = 8.2$  Hz, 1H), 7.25 (d,  $J = 14.6$  Hz, 1H), 7.20 (s, 1H), 6.93 (d,  $J = 7.9$  Hz, 1H), 4.71 (s, 2H), 3.84 (s, 3H), 2.75 (s, 3H).  $^{13}C$  NMR (125 MHz,  $CDCl_3$ )  $\delta$  146.56, 142.84, 140.44, 140.18, 134.30, 132.77, 131.49, 130.65, 130.51, 130.14, 128.76, 127.71, 121.58, 120.92, 119.80, 113.02, 109.55, 40.67, 32.05, 23.87. HRMS (ESI): calcd. for  $C_{20}H_{17}Cl_2N_2^+$  ( $[M+H]^+$ ): 355.0763, found 355.0766.

### 1,3,9-Trimethyl-9H-pyrido[3,4-b]indole

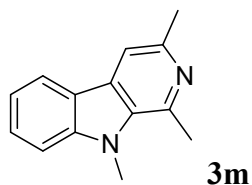

White solid (51 mg, 60%), mp: 86-87 °C.  $^1H$  NMR (500 MHz,  $CDCl_3$ )  $\delta$  8.02 (d,  $J = 7.8$  Hz, 1H), 7.61 (s, 1H), 7.54 (t,  $J = 7.7$  Hz, 1H), 7.35 (d,  $J = 8.3$  Hz, 1H), 7.21 (t,  $J = 7.4$  Hz, 1H), 4.02 (s, 3H), 3.01 (s, 3H), 2.66 (s, 3H).  $^{13}C$  NMR (125 MHz,  $CDCl_3$ )  $\delta$  146.15, 142.60, 140.71, 134.31, 129.93, 128.09, 121.45, 121.02, 119.32, 111.74, 109.37, 32.24, 24.03, 23.44. HRMS (ESI): calcd. for  $C_{14}H_{15}N_2^+$  ( $[M+H]^+$ ): 211.1230, found 211.1226.

### 3,9-Dimethyl-1-propyl-9H-pyrido[3,4-b]indole

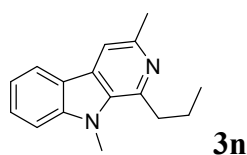



White solid (53 mg, 56%), mp: 87-88 °C. <sup>1</sup>H NMR (500 MHz, CDCl<sub>3</sub>) δ 8.06 (d, *J* = 7.8 Hz, 1H), 7.65 (s, 1H), 7.55 (t, *J* = 7.7 Hz, 1H), 7.40 (d, *J* = 8.3 Hz, 1H), 7.26-7.20 (m, 1H), 4.05 (s, 3H), 3.33 – 3.22 (m, 2H), 2.68 (s, 3H), 1.91 – 1.81 (m, 2H), 1.09 (t, *J* = 7.3 Hz, 3H). <sup>13</sup>C NMR (125 MHz, CDCl<sub>3</sub>) δ 146.39, 145.23, 142.75, 133.79, 130.49, 128.09, 121.40, 121.26, 119.31, 111.61, 109.43, 38.30, 32.21, 24.62, 24.28, 14.26. HRMS (ESI): calcd. for C<sub>16</sub>H<sub>19</sub>N<sub>2</sub><sup>+</sup> ([M+H]<sup>+</sup>): 239.1543, found 239.1544.

### 3,9-Dimethyl-1-(4-(trifluoromethyl)phenyl)-9H-pyrido[3,4-b]indole

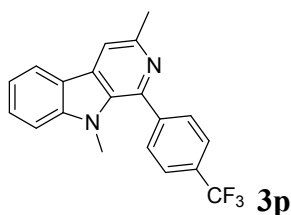

White solid (55 mg, 40%), mp: 173-174 °C. <sup>1</sup>H NMR (500 MHz, CDCl<sub>3</sub>) δ 8.15 (d, *J* = 7.8 Hz, 1H), 7.86 (s, 1H), 7.80 – 7.76 (m, 4H), 7.61 (t, *J* = 7.5 Hz, 1H), 7.40 (d, *J* = 8.3 Hz, 1H), 7.30 (t, *J* = 7.4 Hz, 1H), 3.42 (s, 3H), 2.78 (s, 3H). <sup>13</sup>C NMR (125 MHz, CDCl<sub>3</sub>) δ 146.98, 143.67, 141.22, 133.69, 131.82, 130.34, 128.95, 125.38, 125.36, 125.33, 125.30 (q, *J* = 3.7 Hz), 123.23, 121.75, 121.05, 120.05, 113.37, 109.89, 33.22, 24.15. HRMS (ESI): calcd. for C<sub>20</sub>H<sub>16</sub>F<sub>3</sub>N<sub>2</sub><sup>+</sup> ([M+H]<sup>+</sup>): 341.1260, found 341.1266.

### 1,9-Dimethyl-9H-pyrido[3,4-b]indol-3-yl acetate

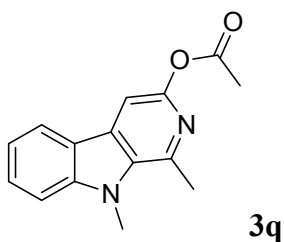

White solid (29 mg, 28%), mp: 135-137 °C. <sup>1</sup>H NMR (500 MHz, CDCl<sub>3</sub>) δ 8.02 (d, *J* = 7.6 Hz, 1H), 7.69 – 7.50 (m, 2H), 7.38 (d, *J* = 8.2 Hz, 1H), 7.23 (t, *J* = 7.4 Hz, 1H), 4.05 (s, 3H), 3.00 (s, 3H), 2.39 (s, 3H). <sup>13</sup>C NMR (125 MHz, CDCl<sub>3</sub>) δ 170.18, 148.80, 143.36, 139.78, 134.82, 132.36, 128.76, 121.74, 120.98, 119.66, 109.56, 104.27, 32.20, 23.10, 21.47. HRMS (ESI): calcd. for C<sub>15</sub>H<sub>15</sub>N<sub>2</sub>O<sub>2</sub><sup>+</sup> ([M+H]<sup>+</sup>): 255.1128, found 255.1132.

## 2) General Procedure and Experimental Details of the Preparation of $\gamma$ -Carbolines

### Procedure A:

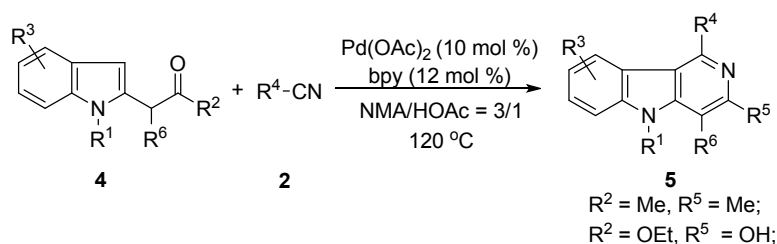

Compound **4** (0.4 mmol), nitrile **2** (0.6 mmol), Pd(OAc)<sub>2</sub> (10 mol %), 2,2'-bipyridine (12 mol %) and HOAc/NMA (v/v = 1/3, 1 mL) were placed in a sealed tube under nitrogen atmosphere. The mixture was stirred at 120 °C for the desired time. Upon completion, the mixture was cooled to room temperature, and then NaHCO<sub>3</sub> was added until no bubbles were generated. The resulting mixture was extracted with DCM three times. The combined organic layers were dried over Na<sub>2</sub>SO<sub>4</sub>, filtered, and concentrated under reduced pressure. The residue was purified by flash column chromatography on a silica gel using petroleum ether/EtOAc as the eluent to give the desired product **5**.

### Procedure B:

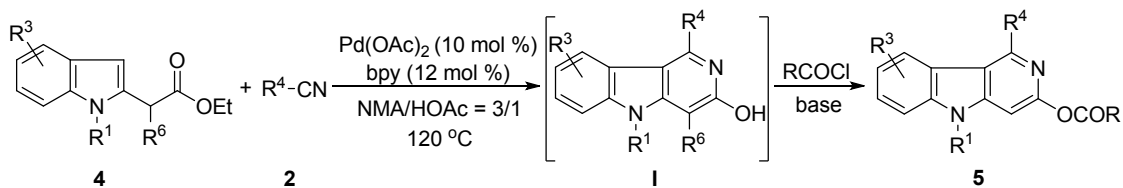

#### For the preparation of acetylated **5**:

Compound **4** (0.4 mmol), nitrile **2** (0.6 mmol), Pd(OAc)<sub>2</sub> (10 mol %), 2,2'-bipyridine (12 mol %) and HOAc/NMA (v/v = 1/3, 1 mL) were placed in a sealed tube under nitrogen atmosphere. The mixture was stirred at 120 °C for the desired time. Upon completion, the mixture was cooled to 0 °C, then excess Et<sub>3</sub>N and acetyl chloride (0.88 mmol) were added at the same temperature. After completion, the mixture was extracted with DCM three times. The combined organic layers were dried over Na<sub>2</sub>SO<sub>4</sub>, filtered, and concentrated under reduced pressure. The residue was purified by flash column chromatography on a silica gel using petroleum ether/EtOAc as the eluent to give acetylated product **5**.

#### For the preparation of benzoylated **5**:

A mixture of substrate **4** (0.4 mmol), nitrile **2** (0.6 mmol), Pd(OAc)<sub>2</sub> (10 mol %) and 2,2'-bipyridine (12 mol %) in HOAc/NMA (v/v = 1/3, 1 mL) was stirred in a sealed tube under nitrogen atmosphere

at 120 °C. Upon completion, the mixture was cooled to room temperature, and purified by flash column chromatography (MeOH/DCM) on a silica gel to give the crude product. The resultant crude product was dissolved in dry DCM (4 ml) at 0 °C, then pyridine (0.6 mmol) and benzoyl chloride (0.48 mmol) were added. Upon completion, the mixture was extracted with DCM three times. The combined organic layers were dried over Na<sub>2</sub>SO<sub>4</sub>, filtered, and concentrated under reduced pressure. The residue was purified by flash column chromatography on a silica gel using petroleum ether/EtOAc as the eluent to give benzoylated product **5**.

### 1-(4-Methoxybenzyl)-3,5-dimethyl-5H-pyrido[4,3-b]indole

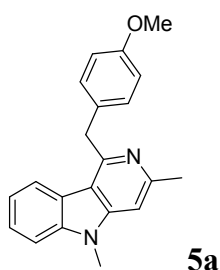

White solid (76 mg, 60%), mp: 128-129 °C. <sup>1</sup>H NMR (500 MHz, CDCl<sub>3</sub>) δ 8.00 (d, *J* = 7.9 Hz, 1H), 7.45 (t, *J* = 7.6 Hz, 1H), 7.37 (d, *J* = 8.1 Hz, 1H), 7.26 – 7.16 (m, 3H), 7.05 (s, 1H), 6.74 (d, *J* = 8.6 Hz, 2H), 4.65 (s, 2H), 3.77 (s, 3H), 3.70 (s, 3H), 2.73 (s, 3H). <sup>13</sup>C NMR (125 MHz, CDCl<sub>3</sub>) δ 158.02, 154.38, 153.49, 147.02, 141.19, 131.12, 129.52, 125.86, 122.49, 121.74, 120.48, 115.87, 113.94, 108.70, 101.41, 55.26, 41.98, 29.14, 25.23. HRMS (ESI): calcd. for C<sub>21</sub>H<sub>21</sub>N<sub>2</sub>O<sup>+</sup> ([M+H]<sup>+</sup>): 317.1648, found 317.1645.

### 1-(4-Methoxybenzyl)-5-methyl-5H-pyrido[4,3-b]indol-3-yl benzoate

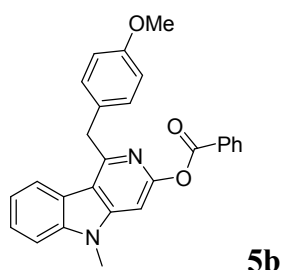

White solid (152 mg, 90%), mp: 156-157 °C. <sup>1</sup>H NMR (500 MHz, CDCl<sub>3</sub>) δ 8.29 (d, *J* = 7.3 Hz, 2H), 8.06 (d, *J* = 7.9 Hz, 1H), 7.64 (t, *J* = 7.4 Hz, 1H), 7.55 – 7.45 (m, 3H), 7.41 (d, *J* = 8.1 Hz, 1H), 7.31 – 7.20 (m, 3H), 7.10 (s, 1H), 6.77 (d, *J* = 8.6 Hz, 2H), 4.66 (s, 2H), 3.81 (s, 3H), 3.71 (s, 3H). <sup>13</sup>C NMR

(125 MHz, CDCl<sub>3</sub>)  $\delta$  165.62, 158.16, 154.91, 153.95, 148.66, 142.08, 133.81, 130.59, 130.51, 129.71, 129.61, 128.63, 126.44, 122.73, 121.33, 120.96, 117.43, 114.05, 108.92, 94.25, 55.30, 41.67, 29.49. HRMS (ESI): calcd. for C<sub>27</sub>H<sub>23</sub>N<sub>2</sub>O<sub>3</sub><sup>+</sup> ([M+H]<sup>+</sup>): 423.1703, found 423.1711.

### 5-Benzyl-1-(4-methoxybenzyl)-5H-pyrido[4,3-b]indol-3-yl benzoate

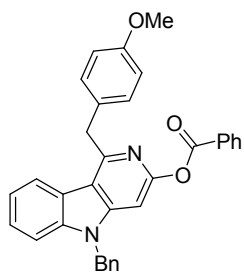

White solid (130 mg, 65%), mp: 165-166 °C. <sup>1</sup>H NMR (500 MHz, CDCl<sub>3</sub>)  $\delta$  8.26 (d, *J* = 7.1 Hz, 2H), 8.11 (d, *J* = 7.5 Hz, 1H), 7.62 (t, *J* = 7.4 Hz, 1H), 7.49 (t, *J* = 7.7 Hz, 2H), 7.43 (t, *J* = 7.6 Hz, 1H), 7.36 (dd, *J* = 8.0, 3.0 Hz, 1H), 7.33 - 7.23 (m, 6H), 7.14 (d, *J* = 7.1 Hz, 2H), 7.10 (s, 1H), 6.79 (d, *J* = 8.1 Hz, 2H), 5.45 (d, *J* = 9.9 Hz, 2H), 4.69 (s, 2H), 3.72 (s, 3H). <sup>13</sup>C NMR (125 MHz, CDCl<sub>3</sub>)  $\delta$  165.47, 158.22, 155.04, 154.14, 148.56, 141.72, 135.93, 133.79, 130.57, 130.45, 129.69, 129.68, 129.13, 128.62, 128.02, 126.60, 126.56, 122.83, 121.57, 121.25, 117.59, 114.10, 109.53, 94.59, 55.30, 46.98, 41.69. HRMS (ESI): calcd. for C<sub>33</sub>H<sub>27</sub>N<sub>2</sub>O<sub>3</sub><sup>+</sup> ([M+H]<sup>+</sup>): 499.2016, found 499.2012.

### 1-(4-Methoxybenzyl)-5H-pyrido[4,3-b]indol-3-ol

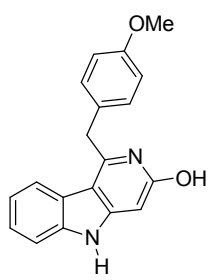

White solid (79 mg, 65%), mp: 267-269 °C. <sup>1</sup>H NMR (500 MHz, DMSO)  $\delta$  11.98 (brs, 1H), 11.09 (s, 1H), 7.75 (d, *J* = 7.7 Hz, 1H), 7.28-7.21 (m, 4H), 7.09 – 6.97 (m, 1H), 6.84 (d, *J* = 8.5 Hz, 2H), 5.89 (s, 1H), 4.33 (s, 2H), 3.66 (s, 3H). <sup>13</sup>C NMR (125 MHz, DMSO)  $\delta$  162.89, 158.01, 151.90, 144.00, 142.12, 129.13, 129.07, 125.68, 121.88, 120.69, 119.98, 114.05, 110.27, 107.64, 88.90, 54.98, 35.46. HRMS (ESI): calcd. for C<sub>19</sub>H<sub>17</sub>N<sub>2</sub>O<sub>2</sub><sup>+</sup> ([M+H]<sup>+</sup>): 305.1285, found 305.1291.

### 5-Acetyl-1-benzyl-8-methoxy-5H-pyrido[4,3-b]indol-3-yl acetate

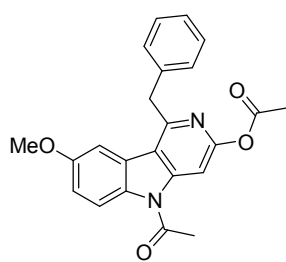

**5e**

White solid (101 mg, 65%), mp: 128-129 °C. <sup>1</sup>H NMR (500 MHz, CDCl<sub>3</sub>) 8.01 (d, *J* = 9.2 Hz, 1H), 7.87 (s, 1H), 7.33 (d, *J* = 2.5 Hz, 1H), 7.25 – 7.14 (m, 5H), 7.02 (dd, *J* = 9.2, 2.6 Hz, 1H), 4.65 (s, 2H), 3.75 (s, 3H), 2.83 (s, 3H), 2.41 (s, 3H). <sup>13</sup>C NMR (125 MHz, CDCl<sub>3</sub>) δ 169.75, 169.55, 156.80, 155.75, 153.25, 147.45, 137.67, 133.58, 128.83, 128.39, 126.69, 124.88, 120.02, 116.56, 115.31, 106.50, 102.12, 55.81, 42.70, 27.71, 21.52. HRMS (ESI): calcd. for C<sub>23</sub>H<sub>21</sub>N<sub>2</sub>O<sub>4</sub><sup>+</sup> ([M+H]<sup>+</sup>): 389.1496, found 389.1498.

### 5-Acetyl-1-benzyl-8-chloro-5H-pyrido[4,3-b]indol-3-yl acetate

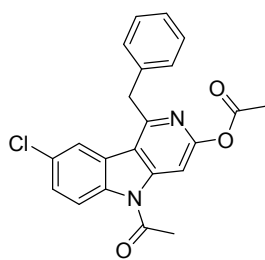

**5f**

White solid (79 mg, 50%), mp: 167-168 °C. <sup>1</sup>H NMR (500 MHz, DMSO) δ 8.28 (d, *J* = 9.0 Hz, 1H), 8.05 (s, 1H), 7.88 (s, 1H), 7.58 (d, *J* = 8.8 Hz, 1H), 7.27 (t, *J* = 7.4 Hz, 2H), 7.22-7.15 (m, 3H), 4.64 (s, 2H), 2.87 (s, 3H), 2.35 (s, 3H). <sup>13</sup>C NMR (125 MHz, DMSO) δ 170.83, 169.18, 155.70, 153.52, 146.84, 137.65, 137.52, 128.53, 128.31, 127.44, 126.41, 124.23, 121.80, 117.71, 117.58, 101.71, 41.20, 27.49, 20.95. HRMS (ESI): calcd. for C<sub>22</sub>H<sub>18</sub>ClN<sub>2</sub>O<sub>3</sub><sup>+</sup> ([M+H]<sup>+</sup>): 393.1000, found 393.1008.

### 5-Acetyl-1-benzyl-7-chloro-5H-pyrido[4,3-b]indol-3-yl acetate

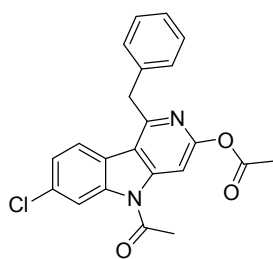

**5g**

White solid (83 mg, 53%), mp: 168-169 °C. <sup>1</sup>H NMR (500 MHz, DMSO) δ 8.30 (d, *J* = 1.6 Hz, 1H), 8.08 (d, *J* = 8.5 Hz, 1H), 7.83 (s, 1H), 7.45 (dd, *J* = 8.5, 1.6 Hz, 1H), 7.27 – 7.20 (m, 4H), 7.16 (t, *J* = 6.9 Hz, 1H), 4.59 (s, 2H), 2.87 (s, 3H), 2.35 (s, 3H). <sup>13</sup>C NMR (125 MHz, DMSO) δ 170.92, 169.20, 155.47, 153.12, 146.63, 139.56, 137.63, 132.20, 128.49, 128.34, 126.38, 124.33, 123.43, 121.54, 117.94, 116.07, 101.66, 41.11, 27.44, 20.95. HRMS (ESI): calcd. for C<sub>22</sub>H<sub>18</sub>ClN<sub>2</sub>O<sub>3</sub><sup>+</sup> ([M+H]<sup>+</sup>): 393.1000, found 393.0998.

### 1-Benzyl-5-methyl-5H-pyrido[4,3-b]indol-3-yl benzoate

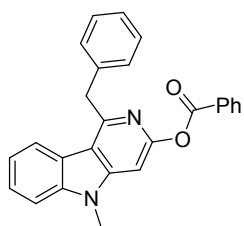

**5h**

White solid (138 mg, 88%), mp: 187-189 °C. <sup>1</sup>H NMR (500 MHz, CDCl<sub>3</sub>) δ 8.30 (d, *J* = 7.3 Hz, 2H), 8.04 (d, *J* = 7.9 Hz, 1H), 7.64 (t, *J* = 7.4 Hz, 1H), 7.56 – 7.47 (m, 3H), 7.41 (d, *J* = 8.1 Hz, 1H), 7.31 (d, *J* = 7.5 Hz, 2H), 7.29 – 7.20 (m, 3H), 7.15 (d, *J* = 7.3 Hz, 1H), 7.12 (s, 1H), 4.73 (s, 2H), 3.82 (s, 3H). <sup>13</sup>C NMR (125 MHz, CDCl<sub>3</sub>) δ 165.62, 154.92, 153.51, 148.67, 142.10, 138.42, 133.82, 130.60, 129.70, 128.67, 128.64, 128.62, 126.49, 126.38, 122.70, 121.33, 120.98, 117.60, 108.94, 94.34, 42.54, 29.51. HRMS (ESI): calcd. for C<sub>26</sub>H<sub>21</sub>N<sub>2</sub>O<sub>2</sub><sup>+</sup> ([M+H]<sup>+</sup>): 393.1598, found 393.1596.

### 5-Methyl-1-(2-methylbenzyl)-5H-pyrido[4,3-b]indol-3-yl benzoate

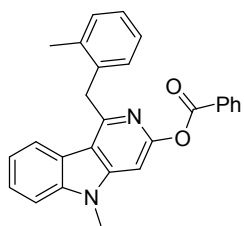

**5i**

White solid (146 mg, 90%), mp: 171-172 °C. <sup>1</sup>H NMR (500 MHz, CDCl<sub>3</sub>) δ 8.27 (d, *J* = 8.2 Hz, 2H), 7.71 (d, *J* = 7.9 Hz, 1H), 7.62 (t, *J* = 7.5 Hz, 1H), 7.54 – 7.45 (m, 3H), 7.41 (d, *J* = 8.2 Hz, 1H), 7.20 (dd, *J* = 16.6, 8.3 Hz, 2H), 7.14 (s, 1H), 7.07 (t, *J* = 7.4 Hz, 1H), 6.91 (t, *J* = 7.5 Hz, 1H), 6.73 (d, *J* = 7.6 Hz, 1H), 4.64 (s, 2H), 3.84 (d, *J* = 2.3 Hz, 3H), 2.49 (s, 3H). <sup>13</sup>C NMR (125 MHz, CDCl<sub>3</sub>) δ 165.60, 155.09, 153.32, 148.50, 142.09, 136.57, 136.41, 133.79, 130.58, 130.04, 129.70, 128.62, 127.74,

126.46, 126.34, 126.20, 122.54, 121.32, 121.02, 118.04, 108.90, 94.34, 40.24, 29.54, 20.19. HRMS (ESI): calcd. for  $C_{27}H_{23}N_2O_2^+$  ( $[M+H]^+$ ): 407.1754, found 407.1759.

### 1-(3-Chlorobenzyl)-5-methyl-5H-pyrido[4,3-b]indol-3-yl benzoate

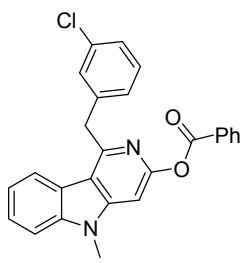

White solid (154 mg, 90%), mp: 118-119 °C.  $^1H$  NMR (500 MHz,  $CDCl_3$ )  $\delta$  8.29 (d,  $J = 7.5$  Hz, 2H), 7.98 (d,  $J = 7.7$  Hz, 1H), 7.63 (t,  $J = 7.2$  Hz, 1H), 7.54-7.46 (m, 3H), 7.40 (d,  $J = 8.0$  Hz, 1H), 7.31-7.23 (m, 2H), 7.20 – 7.08 (m, 4H), 4.68 (s, 2H), 3.80 (s, 3H).  $^{13}C$  NMR (125 MHz,  $CDCl_3$ )  $\delta$  165.56, 154.93, 152.41, 148.66, 142.11, 140.46, 134.39, 133.84, 130.57, 129.83, 129.61, 128.74, 128.64, 126.87, 126.66, 126.62, 122.42, 121.07, 117.55, 109.05, 94.57, 42.06, 29.49. HRMS (ESI): calcd. for  $C_{26}H_{20}ClN_2O_2^+$  ( $[M+H]^+$ ): 427.1208, found 427.1218.

### 1-(4-Chlorobenzyl)-5-methyl-5H-pyrido[4,3-b]indol-3-yl benzoate

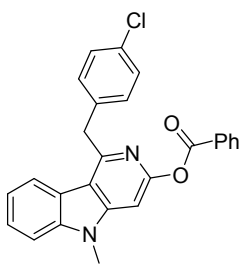

White solid (150 mg, 88%), mp: 201-202 °C.  $^1H$  NMR (500 MHz,  $CDCl_3$ )  $\delta$  8.28 (d,  $J = 7.9$  Hz, 2H), 7.97 (d,  $J = 7.9$  Hz, 1H), 7.63 (t,  $J = 7.3$  Hz, 1H), 7.54-7.46 (m, 3H), 7.40 (d,  $J = 8.1$  Hz, 1H), 7.30 – 7.16 (m, 5H), 7.11 (s, 1H), 4.66 (s, 2H), 3.79 (s, 3H).  $^{13}C$  NMR (125 MHz,  $CDCl_3$ )  $\delta$  165.58, 154.92, 152.82, 148.64, 142.08, 136.88, 133.85, 132.17, 130.56, 130.00, 129.59, 128.71, 128.64, 126.61, 122.44, 121.07, 121.03, 117.45, 109.04, 94.49, 41.78, 29.48. HRMS (ESI): calcd. for  $C_{26}H_{20}ClN_2O_2^+$  ( $[M+H]^+$ ): 427.1208, found 427.1210.

### 1-(4-Bromobenzyl)-5-methyl-5H-pyrido[4,3-b]indol-3-yl benzoate

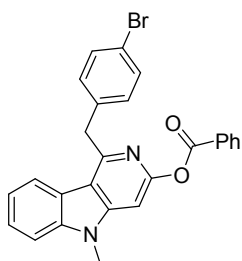

**5l**

White solid (151 mg, 80%), mp: 224-225 °C. <sup>1</sup>H NMR (500 MHz, CDCl<sub>3</sub>) δ 8.29 (d, *J* = 7.5 Hz, 2H), 7.98 (d, *J* = 7.9 Hz, 1H), 7.64 (t, *J* = 7.4 Hz, 1H), 7.57 – 7.47 (m, 3H), 7.42 (d, *J* = 8.1 Hz, 1H), 7.34 (d, *J* = 8.3 Hz, 2H), 7.30-7.24 (m, 1H), 7.17 (d, *J* = 8.2 Hz, 2H), 7.12 (s, 1H), 4.65 (s, 2H), 3.82 (s, 3H). <sup>13</sup>C NMR (125 MHz, CDCl<sub>3</sub>) δ 165.59, 154.95, 152.75, 148.67, 142.11, 137.42, 133.87, 131.68, 130.58, 130.42, 129.60, 128.66, 126.64, 122.46, 121.10, 121.06, 120.29, 117.48, 109.07, 94.51, 41.86, 29.52. HRMS (ESI): calcd. for C<sub>26</sub>H<sub>20</sub>BrN<sub>2</sub>O<sub>2</sub><sup>+</sup> ([M+H]<sup>+</sup>): 471.0703, found 471.0702.

**1-(3,4-Dichlorobenzyl)-5-methyl-5H-pyrido[4,3-b]indol-3-yl benzoate**

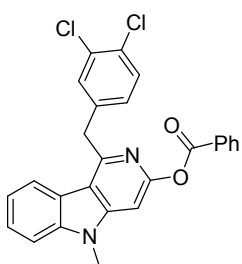

**5m**

White solid (166 mg, 90%), mp: 235-236 °C. <sup>1</sup>H NMR (500 MHz, CDCl<sub>3</sub>) δ 8.28 (d, *J* = 7.4 Hz, 2H), 7.95 (d, *J* = 7.9 Hz, 1H), 7.63 (t, *J* = 7.4 Hz, 1H), 7.51 (t, *J* = 7.7 Hz, 3H), 7.43 – 7.36 (m, 2H), 7.30-7.23 (m, 2H), 7.14-7.10 (m, 2H), 4.64 (s, 2H), 3.79 (s, 3H). <sup>13</sup>C NMR (125 MHz, CDCl<sub>3</sub>) δ 165.54, 154.95, 151.92, 148.65, 142.10, 138.69, 133.87, 132.50, 130.57, 130.55, 130.47, 130.44, 129.53, 128.65, 128.14, 126.72, 122.23, 121.13, 120.91, 117.43, 109.14, 94.68, 41.43, 29.49. HRMS (ESI): calcd. for C<sub>26</sub>H<sub>19</sub>Cl<sub>2</sub>N<sub>2</sub>O<sub>2</sub><sup>+</sup> ([M+H]<sup>+</sup>): 461.0818, found 461.0812.

**1,5-Dimethyl-5H-pyrido[4,3-b]indol-3-yl benzoate**

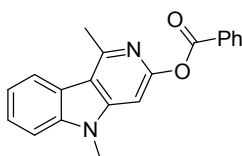

**5n**

White solid (116 mg, 92%), mp: 146-147 °C. <sup>1</sup>H NMR (500 MHz, CDCl<sub>3</sub>) δ 8.28 (d, *J* = 7.4 Hz, 2 H), 8.07 (d, *J* = 7.8 Hz, 1H), 7.62 (t, *J* = 7.4 Hz, 1H), 7.50 (t, *J* = 7.6 Hz, 3H), 7.38 (d, *J* = 8.1 Hz, 1H),



7.32 (t,  $J = 7.5$  Hz, 1H), 7.01 (s, 1H), 3.73 (s, 3H), 2.99 (s, 3H).  $^{13}\text{C}$  NMR (125 MHz,  $\text{CDCl}_3$ )  $\delta$  165.57, 154.63, 151.99, 147.89, 141.81, 133.74, 130.49, 129.61, 128.58, 126.20, 122.33, 121.86, 120.81, 117.05, 108.83, 93.73, 29.32, 23.41. HRMS (ESI): calcd. for  $\text{C}_{20}\text{H}_{17}\text{N}_2\text{O}_2^+$  ( $[\text{M}+\text{H}]^+$ ): 317.1285, found 317.1276.

#### 5-Methyl-1-propyl-5H-pyrido[4,3-b]indol-3-yl benzoate

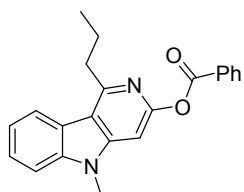

White solid (123 mg, 89%), mp: 119-120 °C.  $^1\text{H}$  NMR (500 MHz,  $\text{CDCl}_3$ )  $\delta$  8.29 (d,  $J = 7.3$  Hz, 2H), 8.08 (d,  $J = 7.8$  Hz, 1H), 7.63 (t,  $J = 7.4$  Hz, 1H), 7.56 – 7.47 (m, 3H), 7.41 (d,  $J = 8.1$  Hz, 1H), 7.35 (t,  $J = 7.5$  Hz, 1H), 7.02 (s, 1H), 3.77 (s, 3H), 3.38 – 3.25 (m, 2H), 2.04 – 1.87 (m, 2H), 1.12 (t,  $J = 7.3$  Hz, 3H).  $^{13}\text{C}$  NMR (125 MHz,  $\text{CDCl}_3$ )  $\delta$  165.61, 156.39, 154.81, 148.32, 141.95, 133.73, 130.55, 129.70, 128.57, 126.22, 122.43, 121.55, 120.88, 116.66, 108.93, 93.71, 38.87, 29.38, 22.13, 14.41. HRMS (ESI): calcd. for  $\text{C}_{22}\text{H}_{21}\text{N}_2\text{O}_2^+$  ( $[\text{M}+\text{H}]^+$ ): 345.1598, found 345.1600.

#### 5-Methyl-1-phenyl-5H-pyrido[4,3-b]indol-3-yl benzoate

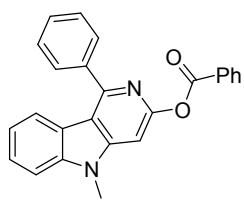

White solid (83 mg, 55%), mp: 104-105 °C.  $^1\text{H}$  NMR (500 MHz,  $\text{CDCl}_3$ )  $\delta$  8.30 (d,  $J = 7.4$  Hz, 2H), 7.85 (d,  $J = 6.9$  Hz, 2H), 7.74 (d,  $J = 7.9$  Hz, 1H), 7.64 (t,  $J = 7.4$  Hz, 1H), 7.60 – 7.45 (m, 6H), 7.43 (d,  $J = 8.1$  Hz, 1H), 7.18 (s, 1H), 7.12 (t,  $J = 7.5$  Hz, 1H), 3.87 (s, 3H).  $^{13}\text{C}$  NMR (125 MHz,  $\text{CDCl}_3$ )  $\delta$  165.63, 154.98, 153.37, 148.93, 142.29, 139.72, 133.81, 130.60, 129.68, 129.30, 129.13, 128.68, 128.63, 126.87, 122.52, 121.39, 120.57, 116.60, 108.89, 94.65, 29.59. HRMS (ESI): calcd. for  $\text{C}_{25}\text{H}_{19}\text{N}_2\text{O}_2^+$  ( $[\text{M}+\text{H}]^+$ ): 379.1441, found 379.1449.

#### 5-Methyl-1-(p-tolyl)-5H-pyrido[4,3-b]indol-3-yl benzoate

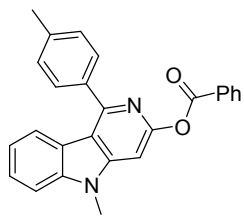

**5q**

White solid (63 mg, 40%), mp: 127-128 °C. <sup>1</sup>H NMR (500 MHz, CDCl<sub>3</sub>) δ 8.29 (d, *J* = 7.7 Hz, 2H), 7.80 (d, *J* = 7.9 Hz, 1H), 7.75 (d, *J* = 7.5 Hz, 2H), 7.62 (t, *J* = 7.3 Hz, 1H), 7.53 – 7.44 (m, 3H), 7.39 (d, *J* = 8.1 Hz, 1H), 7.35 (d, *J* = 7.6 Hz, 2H), 7.15 – 7.09 (m, 2H), 3.82 (s, 3H), 2.46 (s, 3H). <sup>13</sup>C NMR (125 MHz, CDCl<sub>3</sub>) δ 165.60, 154.93, 153.46, 148.90, 142.20, 138.98, 136.81, 133.75, 130.56, 129.69, 129.31, 129.19, 128.59, 126.73, 122.53, 121.44, 120.45, 116.47, 108.82, 94.41, 29.51, 21.59. HRMS (ESI): calcd. for C<sub>26</sub>H<sub>21</sub>N<sub>2</sub>O<sub>2</sub><sup>+</sup> ([M+H]<sup>+</sup>): 393.1598, found 393.1610.

**1-(4-Chlorophenyl)-5-methyl-5H-pyrido[4,3-b]indol-3-yl benzoate**

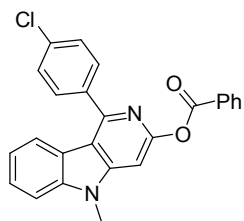

**5r**

White solid (83 mg, 50%), mp: 173-174 °C. <sup>1</sup>H NMR (500 MHz, CDCl<sub>3</sub>) δ 8.28 (d, *J* = 7.2 Hz, 2H), 7.81 (d, *J* = 8.4 Hz, 2H), 7.74 (d, *J* = 7.9 Hz, 1H), 7.63 (t, *J* = 7.5 Hz, 1H), 7.56 – 7.47 (m, 5H), 7.42 (d, *J* = 8.1 Hz, 1H), 7.17 (s, 1H), 7.15 (t, *J* = 7.7 Hz, 1H), 3.84 (s, 3H). <sup>13</sup>C NMR (125 MHz, CDCl<sub>3</sub>) δ 165.60, 155.02, 151.95, 149.01, 142.34, 138.18, 135.21, 133.90, 130.79, 130.61, 129.58, 128.95, 128.67, 127.09, 122.36, 121.12, 120.72, 116.56, 109.05, 94.92, 29.63. HRMS (ESI): calcd. for C<sub>25</sub>H<sub>18</sub>ClN<sub>2</sub>O<sub>2</sub><sup>+</sup> ([M+H]<sup>+</sup>): 413.1051, found 413.1050.

**5-Methyl-1-(4-(trifluoromethyl)phenyl)-5H-pyrido[4,3-b]indol-3-yl benzoate**

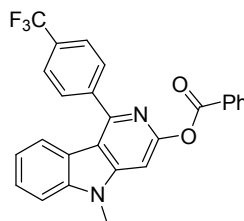

**5s**

White solid (121 mg, 68%), mp: 163-164 °C. <sup>1</sup>H NMR (500 MHz, CDCl<sub>3</sub>) δ 8.29 (d, *J* = 7.5 Hz, 2H), 7.99 (d, *J* = 8.0 Hz, 2H), 7.82 (d, *J* = 8.0 Hz, 2H), 7.69 (d, *J* = 7.9 Hz, 1H), 7.64 (t, *J* = 7.4 Hz, 1H),

7.51 (t,  $J = 7.7$  Hz, 3H), 7.44 (d,  $J = 8.2$  Hz, 1H), 7.21 (s, 1H), 7.15 (t,  $J = 7.5$  Hz, 1H), 3.86 (s, 3H).  $^{13}\text{C}$  NMR (125 MHz,  $\text{CDCl}_3$ )  $\delta$  165.56, 155.04, 151.43, 149.00, 143.26, 142.37, 133.92, 130.57, 129.80, 129.49, 128.67, 127.26, 125.69 (q,  $J = 3.8$  Hz), 122.23, 120.85, 120.81, 116.62, 109.13, 95.27, 29.61. HRMS (ESI): calcd. for  $\text{C}_{26}\text{H}_{18}\text{F}_3\text{N}_2\text{O}_2^+$  ( $[\text{M}+\text{H}]^+$ ): 447.1315, found 447.1316.

### 1-(4-Cyanophenyl)-5-methyl-5H-pyrido[4,3-b]indol-3-yl benzoate

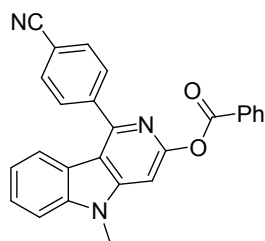

White solid (95 mg, 59%), mp: 177-178 °C.  $^1\text{H}$  NMR (500 MHz,  $\text{CDCl}_3$ )  $\delta$  8.28 (d,  $J = 7.6$  Hz, 2H), 7.99 (d,  $J = 8.0$  Hz, 2H), 7.85 (d,  $J = 7.9$  Hz, 2H), 7.65 (t,  $J = 7.8$  Hz, 2H), 7.52 (t,  $J = 7.0$  Hz, 3H), 7.46 (d,  $J = 8.1$  Hz, 1H), 7.23 (s, 1H), 7.17 (t,  $J = 7.5$  Hz, 1H), 3.88 (s, 3H).  $^{13}\text{C}$  NMR (125 MHz,  $\text{CDCl}_3$ )  $\delta$  165.52, 155.07, 150.70, 149.05, 144.17, 142.42, 133.98, 132.53, 130.57, 130.21, 128.70, 127.44, 122.10, 120.88, 120.60, 118.90, 116.61, 112.82, 109.27, 95.55, 29.66. HRMS (ESI): calcd. for  $\text{C}_{26}\text{H}_{18}\text{N}_3\text{O}_2^+$  ( $[\text{M}+\text{H}]^+$ ): 404.1394, found 404.1395.

### 1-Benzyl-4,5-dimethyl-5H-pyrido[4,3-b]indol-3-yl benzoate

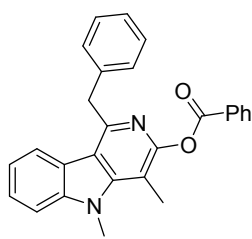

White solid (141 mg, 87%), mp: 129-130 °C.  $^1\text{H}$  NMR (500 MHz,  $\text{CDCl}_3$ )  $\delta$  8.30 (d,  $J = 7.3$  Hz, 2H), 7.99 (d,  $J = 7.9$  Hz, 1H), 7.63 (t,  $J = 7.4$  Hz, 1H), 7.51 (t,  $J = 7.7$  Hz, 2H), 7.45 (t,  $J = 7.6$  Hz, 1H), 7.34 (d,  $J = 8.2$  Hz, 1H), 7.27 (d,  $J = 7.5$  Hz, 2H), 7.25 – 7.16 (m, 3H), 7.11 (t,  $J = 7.3$  Hz, 1H), 4.68 (s, 2H), 4.04 (s, 3H), 2.64 (s, 3H).  $^{13}\text{C}$  NMR (125 MHz,  $\text{CDCl}_3$ )  $\delta$  165.32, 153.75, 150.98, 147.13, 142.55, 138.53, 133.76, 130.58, 129.56, 128.65, 128.57, 126.24, 122.58, 121.05, 120.88, 118.27, 108.94, 105.06, 42.34, 32.34, 12.29. HRMS (ESI): calcd. for  $\text{C}_{19}\text{H}_{17}\text{N}_2\text{O}_2^+$  ( $[\text{M}+\text{H}]^+$ ): 407.1754, found 3407.1750.

## 1,1'-(1,3-Phenylenebis(methylene))bis(5-methyl-5H-pyrido[4,3-b]indole-3,1-diyl) dibenzoate

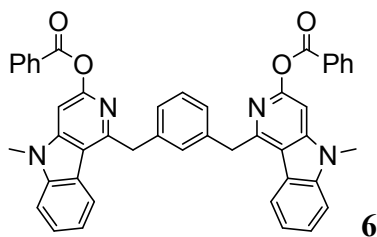

White solid (150 mg, 53%), mp: 156-158 °C. <sup>1</sup>H NMR (500 MHz, CDCl<sub>3</sub>) δ 8.29 (d, *J* = 7.6 Hz, 4H), 7.83 (d, *J* = 7.9 Hz, 2H), 7.63 (t, *J* = 7.3 Hz, 2H), 7.51 (t, *J* = 7.6 Hz, 4H), 7.42 (t, *J* = 7.6 Hz, 2H), 7.38 – 7.29 (m, 3H), 7.09 – 7.03 (m, 7H), 4.64 (s, 4H), 3.78 (s, 6H). <sup>13</sup>C NMR (125 MHz, CDCl<sub>3</sub>) δ 165.52, 154.76, 153.34, 148.47, 141.91, 138.49, 133.76, 130.57, 129.70, 128.91, 128.85, 128.60, 126.51, 126.24, 122.62, 121.14, 120.87, 117.54, 108.66, 94.20, 42.42, 29.41. HRMS (ESI): calcd. for C<sub>46</sub>H<sub>35</sub>N<sub>4</sub>O<sub>4</sub><sup>+</sup> ([M+H]<sup>+</sup>): 707.2653, found 707.2659.

## V. References

1. G. Zhan, Q. He, X. Yuan, Y. - C. Chen, *Org. Lett.*, 2014, **16**, 6000.
2. Y. Zhang, J. Wang, Y. Nian, H.B. Sun and H. Liu, *Org. Chem. Curr. Res.*, 2014, **3**, 124.
3. R. Örkényi, G. Beke, E. Riethmüller, and I. Greiner, *Eur. J. Org. Chem.*, 2017, 6525.
4. M. D. Ennis, R. L. Hoffman, N. B. Ghazal, and D. M. Dinh, *Bio. Med. Chem. Lett.*, 2003, **13**, 2369.

German Edition: D OI: 1 0.1002/ange.201500596

C

€

H A ctivation

International Edition: D OI: 1 0.1002/anie.201500596

Isomerization o f O lefins iggered by Rhodium-Catalyzed C

€

H B ond

Activation: C ontrol of Endocyclic b-Hydrogen E limination\*\*

Stephanie Y . Y . Y ip and Christophe A□ssa\*

German Edition: D OI: 1 0.1002/ange.201500596

C

€

H A ctivation

International Edition: D OI: 1 0.1002/anie.201500596

Isomerization o f O lefins iggered by Rhodium-Catalyzed C

€

H B ond

Activation: C ontrol of Endocyclic b-Hydrogen E limination\*\*

Stephanie Y . Y . Y ip and Christophe A□ssa\*

5. S. Y. Y. Yip and C. Aissa, *Angew. Chem., Int. Ed.*, 2015, **54**, 6870.
6. D. Kumar, N. M. Kumar, B. Noel, K. Shah, *Eur. J. Med. Chem.*, 2012, **55**, 432.
7. M. C. DiPoto, R. P. Hughes and J. Wu, *J. Am. Chem. Soc.*, 2015, **137**, 14861.

## VI. Crystal Data and Structure Refinement

### 1) Compound **3g**

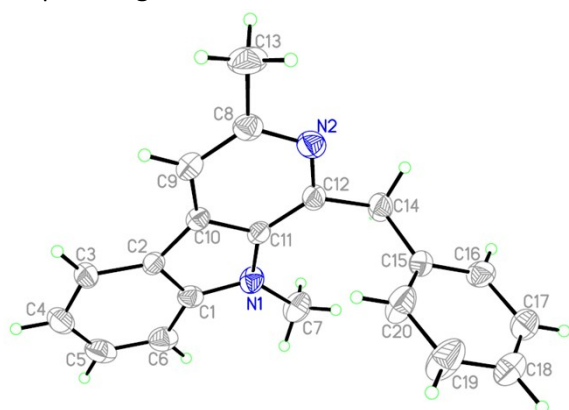

CCDC 1813722

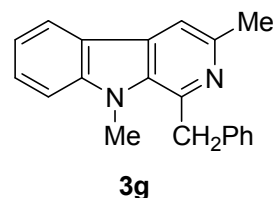

Table 1. Crystal data and structure refinement for **3g**.

|                                 |                                                |          |
|---------------------------------|------------------------------------------------|----------|
| Identification code             | <b>3g</b>                                      |          |
| Empirical formula               | C <sub>20</sub> H <sub>18</sub> N <sub>2</sub> |          |
| Formula weight                  | 286.36                                         |          |
| Temperature                     | 293(2) K                                       |          |
| Wavelength                      | 1.54178 Å                                      |          |
| Crystal system                  | Orthorhombic                                   |          |
| Space group                     | Pbca                                           |          |
| Unit cell dimensions            | a = 5.8216(2) Å                                | a = 90°. |
|                                 | b = 19.8873(8) Å                               | b = 90°. |
|                                 | c = 27.2396(9) Å                               | g = 90°. |
| Volume                          | 3153.7(2) Å <sup>3</sup>                       |          |
| Z                               | 8                                              |          |
| Density (calculated)            | 1.206 Mg/m <sup>3</sup>                        |          |
| Absorption coefficient          | 0.547 mm <sup>-1</sup>                         |          |
| F(000)                          | 1216                                           |          |
| Crystal size                    | 0.23 x 0.21 x 0.20 mm <sup>3</sup>             |          |
| Theta range for data collection | 3.24 to 62.48°.                                |          |
| Index ranges                    | -6 ≤ h ≤ 5, -21 ≤ k ≤ 22, -31 ≤ l ≤ 30         |          |
| Reflections collected           | 11550                                          |          |
| Independent reflections         | 2447 [R(int) = 0.1639]                         |          |
| Completeness to theta = 62.48°  | 97.2 %                                         |          |
| Absorption correction           | Semi-empirical from equivalents                |          |
| Max. and min. transmission      | 0.8985 and 0.8845                              |          |
| Refinement method               | Full-matrix least-squares on F <sup>2</sup>    |          |
| Data / restraints / parameters  | 2447 / 0 / 166                                 |          |

|                                      |                                       |
|--------------------------------------|---------------------------------------|
| Goodness-of-fit on $F^2$             | 1.039                                 |
| Final R indices [ $I > 2\sigma(I)$ ] | $R1 = 0.1282$ , $wR2 = 0.2265$        |
| R indices (all data)                 | $R1 = 0.1748$ , $wR2 = 0.2439$        |
| Extinction coefficient               | 0.00423(11)                           |
| Largest diff. peak and hole          | 0.297 and -0.244 e. $\text{\AA}^{-3}$ |

Table 2. Atomic coordinates ( $\times 10^4$ ) and equivalent isotropic displacement parameters ( $\text{\AA}^2 \times 10^3$ ) for Y.  $U(\text{eq})$  is defined as one third of the trace of the orthogonalized  $U^{ij}$  tensor.

|       | x       | y       | z       | $U(\text{eq})$ |
|-------|---------|---------|---------|----------------|
| C(1)  | 1992(3) | 4643(1) | 1484(1) | 47(1)          |
| C(2)  | 3889(3) | 4730(1) | 1787(1) | 40(1)          |
| C(3)  | 4699(4) | 4195(1) | 2066(1) | 50(1)          |
| C(4)  | 3612(4) | 3574(1) | 2042(1) | 66(1)          |
| C(5)  | 1716(4) | 3487(1) | 1739(1) | 68(1)          |
| C(6)  | 906(3)  | 4021(1) | 1460(1) | 62(1)          |
| N(1)  | 1550(4) | 5222(1) | 1227(1) | 52(1)          |
| C(7)  | -259(6) | 5283(2) | 861(1)  | 70(1)          |
| C(8)  | 6623(2) | 6463(1) | 1795(1) | 51(1)          |
| C(9)  | 6323(3) | 5797(1) | 1936(1) | 49(1)          |
| C(10) | 4581(3) | 5415(1) | 1727(1) | 40(1)          |
| C(11) | 3139(3) | 5698(1) | 1377(1) | 41(1)          |
| C(12) | 3438(3) | 6364(1) | 1236(1) | 47(1)          |
| N(2)  | 5180(3) | 6747(1) | 1445(1) | 54(1)          |
| C(13) | 8350(7) | 6922(2) | 2003(1) | 76(1)          |
| C(14) | 2090(6) | 6750(2) | 855(1)  | 58(1)          |
| C(15) | 2842(3) | 6609(1) | 325(1)  | 48(1)          |
| C(16) | 1670(3) | 6945(1) | -46(1)  | 60(1)          |
| C(17) | 2344(4) | 6866(1) | -533(1) | 69(1)          |
| C(18) | 4189(4) | 6451(1) | -648(1) | 68(1)          |
| C(19) | 5360(4) | 6115(2) | -277(1) | 96(2)          |
| C(20) | 4687(3) | 6194(1) | 209(1)  | 76(1)          |

Table 3. Selected bond lengths [ $\text{\AA}$ ] and angles [ $^\circ$ ] for Y.

---

Symmetry transformations used to generate equivalent atoms:

Table 4. Bond lengths [Å] and angles [°] for Y.

---

|                 |            |
|-----------------|------------|
| C(1)-N(1)       | 1.370(3)   |
| C(1)-C(2)       | 1.3900     |
| C(1)-C(6)       | 1.3900     |
| C(2)-C(3)       | 1.3900     |
| C(2)-C(10)      | 1.430(2)   |
| C(3)-C(4)       | 1.3900     |
| C(4)-C(5)       | 1.3900     |
| C(5)-C(6)       | 1.3900     |
| N(1)-C(11)      | 1.386(3)   |
| N(1)-C(7)       | 1.456(4)   |
| C(8)-C(9)       | 1.3900     |
| C(8)-N(2)       | 1.3900     |
| C(8)-C(13)      | 1.471(4)   |
| C(9)-C(10)      | 1.3900     |
| C(10)-C(11)     | 1.3900     |
| C(11)-C(12)     | 1.3900     |
| C(12)-N(2)      | 1.3900     |
| C(12)-C(14)     | 1.511(3)   |
| C(14)-C(15)     | 1.536(3)   |
| C(15)-C(16)     | 1.3900     |
| C(15)-C(20)     | 1.3900     |
| C(16)-C(17)     | 1.3900     |
| C(17)-C(18)     | 1.3900     |
| C(18)-C(19)     | 1.3900     |
| C(19)-C(20)     | 1.3900     |
|                 |            |
| N(1)-C(1)-C(2)  | 110.34(13) |
| N(1)-C(1)-C(6)  | 129.59(13) |
| C(2)-C(1)-C(6)  | 120.0      |
| C(1)-C(2)-C(3)  | 120.0      |
| C(1)-C(2)-C(10) | 105.94(12) |
| C(3)-C(2)-C(10) | 134.06(12) |
| C(2)-C(3)-C(4)  | 120.0      |



|                   |            |
|-------------------|------------|
| C(5)-C(4)-C(3)    | 120.0      |
| C(4)-C(5)-C(6)    | 120.0      |
| C(5)-C(6)-C(1)    | 120.0      |
| C(1)-N(1)-C(11)   | 107.40(19) |
| C(1)-N(1)-C(7)    | 123.8(2)   |
| C(11)-N(1)-C(7)   | 128.8(3)   |
| C(9)-C(8)-N(2)    | 120.0      |
| C(9)-C(8)-C(13)   | 124.80(16) |
| N(2)-C(8)-C(13)   | 115.16(16) |
| C(8)-C(9)-C(10)   | 120.0      |
| C(11)-C(10)-C(9)  | 120.0      |
| C(11)-C(10)-C(2)  | 107.12(12) |
| C(9)-C(10)-C(2)   | 132.87(12) |
| N(1)-C(11)-C(12)  | 130.86(16) |
| N(1)-C(11)-C(10)  | 109.13(16) |
| C(12)-C(11)-C(10) | 120.0      |
| N(2)-C(12)-C(11)  | 120.0      |
| N(2)-C(12)-C(14)  | 112.50(16) |
| C(11)-C(12)-C(14) | 127.48(16) |
| C(12)-N(2)-C(8)   | 120.0      |
| C(12)-C(14)-C(15) | 113.9(2)   |
| C(16)-C(15)-C(20) | 120.0      |
| C(16)-C(15)-C(14) | 117.16(15) |
| C(20)-C(15)-C(14) | 122.75(15) |
| C(17)-C(16)-C(15) | 120.0      |
| C(16)-C(17)-C(18) | 120.0      |
| C(19)-C(18)-C(17) | 120.0      |
| C(18)-C(19)-C(20) | 120.0      |
| C(19)-C(20)-C(15) | 120.0      |

---

Symmetry transformations used to generate equivalent atoms:

Table 5. Anisotropic displacement parameters ( $\text{\AA}^2 \times 10^3$ ) for Y. The anisotropic displacement factor exponent takes the form:  $-2p^2 [ h^2 a^* 2U^{11} + \dots + 2 h k a^* b^* U^{12} ]$

|      | U <sup>11</sup> | U <sup>22</sup> | U <sup>33</sup> | U <sup>23</sup> | U <sup>13</sup> | U <sup>12</sup> |
|------|-----------------|-----------------|-----------------|-----------------|-----------------|-----------------|
| C(1) | 51(2)           | 47(2)           | 44(1)           | -6(1)           | 9(2)            | -2(2)           |

|       |       |        |       |        |        |        |
|-------|-------|--------|-------|--------|--------|--------|
| C(2)  | 43(1) | 44(1)  | 33(1) | -1(1)  | -2(1)  | 3(1)   |
| C(3)  | 58(2) | 45(2)  | 47(2) | 1(1)   | 1(2)   | 10(2)  |
| C(4)  | 92(3) | 45(2)  | 60(2) | 2(2)   | 13(2)  | 12(2)  |
| C(5)  | 87(2) | 47(2)  | 69(2) | -10(2) | 24(2)  | -12(2) |
| C(6)  | 67(2) | 60(2)  | 59(2) | -10(2) | 4(2)   | -13(2) |
| N(1)  | 45(1) | 59(1)  | 51(1) | 3(1)   | -14(1) | -2(1)  |
| C(7)  | 54(2) | 94(3)  | 64(2) | 4(2)   | -24(2) | 0(2)   |
| C(8)  | 58(2) | 53(2)  | 44(1) | -6(1)  | 11(2)  | -2(2)  |
| C(9)  | 51(2) | 59(2)  | 38(1) | 1(1)   | -2(1)  | -1(2)  |
| C(10) | 42(1) | 44(2)  | 35(1) | -2(1)  | 1(1)   | 1(1)   |
| C(11) | 41(1) | 48(2)  | 34(1) | -2(1)  | -3(1)  | 7(1)   |
| C(12) | 55(2) | 47(2)  | 40(1) | 2(1)   | 3(2)   | 10(2)  |
| N(2)  | 63(2) | 50(1)  | 51(1) | -3(1)  | 11(1)  | 2(1)   |
| C(13) | 86(2) | 75(2)  | 68(2) | -15(2) | -8(2)  | -36(2) |
| C(14) | 66(2) | 56(2)  | 52(2) | 6(2)   | 6(2)   | 22(2)  |
| C(15) | 54(2) | 46(2)  | 43(1) | 3(1)   | -5(2)  | 4(2)   |
| C(16) | 67(2) | 61(2)  | 53(2) | -7(2)  | -16(2) | 7(2)   |
| C(17) | 83(2) | 71(2)  | 54(2) | 4(2)   | -23(2) | 0(2)   |
| C(18) | 65(2) | 90(3)  | 48(2) | -2(2)  | 0(2)   | -10(2) |
| C(19) | 77(2) | 154(4) | 57(2) | 5(3)   | 13(2)  | 47(3)  |
| C(20) | 69(2) | 112(3) | 49(2) | 13(2)  | 6(2)   | 46(2)  |

Table 6. Hydrogen coordinates ( $\times 10^4$ ) and isotropic displacement parameters ( $\text{\AA}^2 \times 10^3$ ) for Y.

|        | x     | y    | z    | U(eq) |
|--------|-------|------|------|-------|
| H(3)   | 5967  | 4253 | 2270 | 60    |
| H(4)   | 4154  | 3216 | 2230 | 79    |
| H(5)   | 989   | 3071 | 1723 | 81    |
| H(6)   | -363  | 3963 | 1256 | 75    |
| H(7A)  | -598  | 4848 | 727  | 106   |
| H(7B)  | 242   | 5577 | 603  | 106   |
| H(7C)  | -1614 | 5465 | 1012 | 106   |
| H(9)   | 7288  | 5607 | 2170 | 59    |
| H(13A) | 9513  | 6665 | 2169 | 114   |

|        |      |      |      |     |
|--------|------|------|------|-----|
| H(13B) | 7625 | 7221 | 2232 | 114 |
| H(13C) | 9041 | 7178 | 1743 | 114 |
| H(14A) | 2252 | 7227 | 920  | 69  |
| H(14B) | 476  | 6637 | 888  | 69  |
| H(16)  | 436  | 7222 | 31   | 73  |
| H(17)  | 1560 | 7090 | -781 | 83  |
| H(18)  | 4639 | 6398 | -973 | 81  |
| H(19)  | 6594 | 5838 | -354 | 115 |
| H(20)  | 5470 | 5970 | 458  | 92  |

Table 7. Hydrogen bonds for Y [Å and °].

| D-H...A | d(D-H) | d(H...A) | d(D...A) | <(DHA) |
|---------|--------|----------|----------|--------|
|---------|--------|----------|----------|--------|

## 2) Compound **5a**

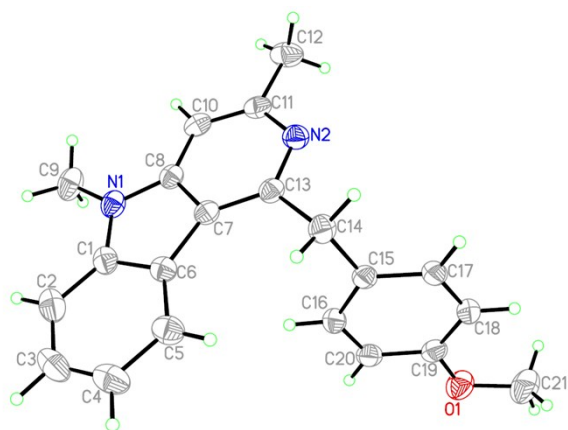

CCDC 1813723

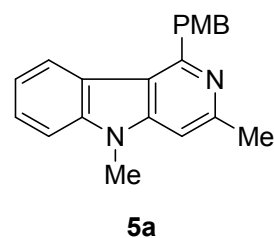

Table 1. Crystal data and structure refinement for **5a**.

|                     |                                                  |
|---------------------|--------------------------------------------------|
| Identification code | <b>5g</b>                                        |
| Empirical formula   | C <sub>21</sub> H <sub>20</sub> N <sub>2</sub> O |
| Formula weight      | 316.39                                           |
| Temperature         | 293(2) K                                         |

|                                   |                                                                                                                                        |
|-----------------------------------|----------------------------------------------------------------------------------------------------------------------------------------|
| Wavelength                        | 0.71073 Å                                                                                                                              |
| Crystal system, space group       | Triclinic, P-1                                                                                                                         |
| Unit cell dimensions              | a = 7.5703(5) Å    alpha = 113.159(2) deg.<br>b = 11.2253(8) Å    beta = 96.838(3) deg.<br>c = 11.2607(8) Å    gamma = 101.414(2) deg. |
| Volume                            | 841.58(10) Å <sup>3</sup>                                                                                                              |
| Z, Calculated density             | 2, 1.249 Mg/m <sup>3</sup>                                                                                                             |
| Absorption coefficient            | 0.077 mm <sup>-1</sup>                                                                                                                 |
| F(000)                            | 336                                                                                                                                    |
| Crystal size                      | 0.21 x 0.20 x 0.18 mm                                                                                                                  |
| Theta range for data collection   | 2.81 to 25.06 deg.                                                                                                                     |
| Limiting indices                  | -9 ≤ h ≤ 9, -13 ≤ k ≤ 13, -13 ≤ l ≤ 13                                                                                                 |
| Reflections collected / unique    | 14685 / 2931 [R(int) = 0.0545]                                                                                                         |
| Completeness to theta = 25.06     | 98.1 %                                                                                                                                 |
| Absorption correction             | Semi-empirical from equivalents                                                                                                        |
| Max. and min. transmission        | 0.9862 and 0.9839                                                                                                                      |
| Refinement method                 | Full-matrix least-squares on F <sup>2</sup>                                                                                            |
| Data / restraints / parameters    | 2931 / 0 / 220                                                                                                                         |
| Goodness-of-fit on F <sup>2</sup> | 1.037                                                                                                                                  |
| Final R indices [I > 2σ(I)]       | R1 = 0.0550, wR2 = 0.1428                                                                                                              |
| R indices (all data)              | R1 = 0.0819, wR2 = 0.1666                                                                                                              |
| Largest diff. peak and hole       | 0.284 and -0.190 e.Å <sup>-3</sup>                                                                                                     |

Table 2. Atomic coordinates ( × 10<sup>4</sup>) and equivalent isotropic displacement parameters (Å<sup>2</sup> × 10<sup>3</sup>) for Y.

U(eq) is defined as one third of the trace of the orthogonalized Uij tensor.

---

|       | x        | y        | z        | U(eq) |
|-------|----------|----------|----------|-------|
| O(1)  | -2150(2) | 3578(2)  | 5797(2)  | 70(1) |
| N(1)  | 3321(2)  | 885(2)   | -618(2)  | 50(1) |
| N(2)  | 1750(2)  | -864(2)  | 1822(2)  | 49(1) |
| C(1)  | 4405(3)  | 2157(2)  | 298(2)   | 48(1) |
| C(2)  | 5300(3)  | 3209(3)  | 55(3)    | 64(1) |
| C(3)  | 6290(4)  | 4380(3)  | 1139(4)  | 73(1) |
| C(4)  | 6395(4)  | 4493(3)  | 2414(3)  | 69(1) |
| C(5)  | 5497(3)  | 3447(2)  | 2655(3)  | 57(1) |
| C(6)  | 4473(3)  | 2245(2)  | 1583(2)  | 43(1) |
| C(7)  | 3362(3)  | 961(2)   | 1431(2)  | 41(1) |
| C(8)  | 2684(3)  | 172(2)   | 57(2)    | 42(1) |
| C(9)  | 2857(4)  | 434(3)   | -2038(2) | 68(1) |
| C(10) | 1557(3)  | -1125(2) | -415(2)  | 49(1) |
| C(11) | 1119(3)  | -1594(2) | 496(2)   | 49(1) |
| C(12) | -96(3)   | -2988(2) | 72(3)    | 69(1) |
| C(13) | 2848(3)  | 398(2)   | 2280(2)  | 43(1) |
| C(14) | 3421(3)  | 1158(2)  | 3764(2)  | 50(1) |
| C(15) | 1984(3)  | 1835(2)  | 4359(2)  | 43(1) |
| C(16) | 1312(3)  | 2693(2)  | 3918(2)  | 49(1) |
| C(17) | -61(3)   | 3248(2)  | 4409(2)  | 51(1) |
| C(18) | -788(3)  | 2971(2)  | 5372(2)  | 49(1) |
| C(19) | -129(3)  | 2142(2)  | 5840(2)  | 52(1) |
| C(20) | 1241(3)  | 1581(2)  | 5319(2)  | 48(1) |
| C(21) | -2830(5) | 3417(3)  | 6859(3)  | 88(1) |

---

Table 3. Selected bond lengths [Å] and angles [deg] for Y.

---



---

Symmetry transformations used to generate equivalent atoms:

Table 4. Bond lengths [Å] and angles [deg] for Y.

---

|              |          |
|--------------|----------|
| O(1)-C(18)   | 1.377(3) |
| O(1)-C(21)   | 1.417(3) |
| N(1)-C(8)    | 1.366(3) |
| N(1)-C(1)    | 1.397(3) |
| N(1)-C(9)    | 1.448(3) |
| N(2)-C(13)   | 1.349(3) |
| N(2)-C(11)   | 1.357(3) |
| C(1)-C(2)    | 1.382(3) |
| C(1)-C(6)    | 1.405(3) |
| C(2)-C(3)    | 1.382(4) |
| C(2)-H(2)    | 0.9300   |
| C(3)-C(4)    | 1.382(4) |
| C(3)-H(3)    | 0.9300   |
| C(4)-C(5)    | 1.376(4) |
| C(4)-H(4)    | 0.9300   |
| C(5)-C(6)    | 1.401(3) |
| C(5)-H(5)    | 0.9300   |
| C(6)-C(7)    | 1.451(3) |
| C(7)-C(13)   | 1.389(3) |
| C(7)-C(8)    | 1.413(3) |
| C(8)-C(10)   | 1.386(3) |
| C(9)-H(9A)   | 0.9600   |
| C(9)-H(9B)   | 0.9600   |
| C(9)-H(9C)   | 0.9600   |
| C(10)-C(11)  | 1.370(3) |
| C(10)-H(10)  | 0.9300   |
| C(11)-C(12)  | 1.504(3) |
| C(12)-H(12A) | 0.9600   |
| C(12)-H(12B) | 0.9600   |
| C(12)-H(12C) | 0.9600   |
| C(13)-C(14)  | 1.506(3) |
| C(14)-C(15)  | 1.520(3) |
| C(14)-H(14A) | 0.9700   |
| C(14)-H(14B) | 0.9700   |
| C(15)-C(20)  | 1.375(3) |
| C(15)-C(16)  | 1.394(3) |
| C(16)-C(17)  | 1.377(3) |
| C(16)-H(16)  | 0.9300   |
| C(17)-C(18)  | 1.383(3) |
| C(17)-H(17)  | 0.9300   |
| C(18)-C(19)  | 1.378(3) |
| C(19)-C(20)  | 1.388(3) |
| C(19)-H(19)  | 0.9300   |

|                   |            |
|-------------------|------------|
| C(20)-H(20)       | 0.9300     |
| C(21)-H(21A)      | 0.9600     |
| C(21)-H(21B)      | 0.9600     |
| C(21)-H(21C)      | 0.9600     |
| <br>              |            |
| C(18)-O(1)-C(21)  | 117.5(2)   |
| C(8)-N(1)-C(1)    | 108.52(17) |
| C(8)-N(1)-C(9)    | 125.8(2)   |
| C(1)-N(1)-C(9)    | 125.6(2)   |
| C(13)-N(2)-C(11)  | 118.90(19) |
| C(2)-C(1)-N(1)    | 128.2(2)   |
| C(2)-C(1)-C(6)    | 122.6(2)   |
| N(1)-C(1)-C(6)    | 109.15(19) |
| C(3)-C(2)-C(1)    | 117.2(3)   |
| C(3)-C(2)-H(2)    | 121.4      |
| C(1)-C(2)-H(2)    | 121.4      |
| C(4)-C(3)-C(2)    | 121.5(3)   |
| C(4)-C(3)-H(3)    | 119.2      |
| C(2)-C(3)-H(3)    | 119.2      |
| C(5)-C(4)-C(3)    | 121.2(3)   |
| C(5)-C(4)-H(4)    | 119.4      |
| C(3)-C(4)-H(4)    | 119.4      |
| C(4)-C(5)-C(6)    | 119.0(2)   |
| C(4)-C(5)-H(5)    | 120.5      |
| C(6)-C(5)-H(5)    | 120.5      |
| C(5)-C(6)-C(1)    | 118.4(2)   |
| C(5)-C(6)-C(7)    | 135.3(2)   |
| C(1)-C(6)-C(7)    | 106.30(19) |
| C(13)-C(7)-C(8)   | 117.8(2)   |
| C(13)-C(7)-C(6)   | 135.82(19) |
| C(8)-C(7)-C(6)    | 106.33(18) |
| N(1)-C(8)-C(10)   | 129.8(2)   |
| N(1)-C(8)-C(7)    | 109.70(19) |
| C(10)-C(8)-C(7)   | 120.5(2)   |
| N(1)-C(9)-H(9A)   | 109.5      |
| N(1)-C(9)-H(9B)   | 109.5      |
| H(9A)-C(9)-H(9B)  | 109.5      |
| N(1)-C(9)-H(9C)   | 109.5      |
| H(9A)-C(9)-H(9C)  | 109.5      |
| H(9B)-C(9)-H(9C)  | 109.5      |
| C(11)-C(10)-C(8)  | 117.6(2)   |
| C(11)-C(10)-H(10) | 121.2      |
| C(8)-C(10)-H(10)  | 121.2      |
| N(2)-C(11)-C(10)  | 123.4(2)   |

|                     |            |
|---------------------|------------|
| N(2)-C(11)-C(12)    | 115.4(2)   |
| C(10)-C(11)-C(12)   | 121.2(2)   |
| C(11)-C(12)-H(12A)  | 109.5      |
| C(11)-C(12)-H(12B)  | 109.5      |
| H(12A)-C(12)-H(12B) | 109.5      |
| C(11)-C(12)-H(12C)  | 109.5      |
| H(12A)-C(12)-H(12C) | 109.5      |
| H(12B)-C(12)-H(12C) | 109.5      |
| N(2)-C(13)-C(7)     | 121.76(19) |
| N(2)-C(13)-C(14)    | 115.50(19) |
| C(7)-C(13)-C(14)    | 122.7(2)   |
| C(13)-C(14)-C(15)   | 112.45(16) |
| C(13)-C(14)-H(14A)  | 109.1      |
| C(15)-C(14)-H(14A)  | 109.1      |
| C(13)-C(14)-H(14B)  | 109.1      |
| C(15)-C(14)-H(14B)  | 109.1      |
| H(14A)-C(14)-H(14B) | 107.8      |
| C(20)-C(15)-C(16)   | 117.3(2)   |
| C(20)-C(15)-C(14)   | 121.16(19) |
| C(16)-C(15)-C(14)   | 121.47(19) |
| C(17)-C(16)-C(15)   | 121.3(2)   |
| C(17)-C(16)-H(16)   | 119.3      |
| C(15)-C(16)-H(16)   | 119.3      |
| C(16)-C(17)-C(18)   | 120.1(2)   |
| C(16)-C(17)-H(17)   | 120.0      |
| C(18)-C(17)-H(17)   | 120.0      |
| O(1)-C(18)-C(19)    | 124.8(2)   |
| O(1)-C(18)-C(17)    | 115.4(2)   |
| C(19)-C(18)-C(17)   | 119.8(2)   |
| C(18)-C(19)-C(20)   | 119.1(2)   |
| C(18)-C(19)-H(19)   | 120.4      |
| C(20)-C(19)-H(19)   | 120.4      |
| C(15)-C(20)-C(19)   | 122.3(2)   |
| C(15)-C(20)-H(20)   | 118.8      |
| C(19)-C(20)-H(20)   | 118.8      |
| O(1)-C(21)-H(21A)   | 109.5      |
| O(1)-C(21)-H(21B)   | 109.5      |
| H(21A)-C(21)-H(21B) | 109.5      |
| O(1)-C(21)-H(21C)   | 109.5      |
| H(21A)-C(21)-H(21C) | 109.5      |
| H(21B)-C(21)-H(21C) | 109.5      |

---

Symmetry transformations used to generate equivalent atoms:



Table 5. Anisotropic displacement parameters ( $\text{\AA}^2 \times 10^3$ ) for Y.

The anisotropic displacement factor exponent takes the form:

$$-2 \pi^2 [ h^2 a^{*2} U_{11} + \dots + 2 h k a^* b^* U_{12} ]$$

|       | U11   | U22    | U33    | U23   | U13   | U12   |
|-------|-------|--------|--------|-------|-------|-------|
| O(1)  | 73(1) | 76(1)  | 67(1)  | 27(1) | 26(1) | 33(1) |
| N(1)  | 52(1) | 61(1)  | 43(1)  | 25(1) | 13(1) | 22(1) |
| N(2)  | 48(1) | 45(1)  | 54(1)  | 21(1) | 13(1) | 15(1) |
| C(1)  | 42(1) | 59(1)  | 59(1)  | 34(1) | 17(1) | 23(1) |
| C(2)  | 55(1) | 79(2)  | 85(2)  | 54(2) | 26(1) | 28(1) |
| C(3)  | 54(2) | 62(2)  | 120(3) | 56(2) | 24(2) | 15(1) |
| C(4)  | 56(2) | 51(2)  | 94(2)  | 29(2) | 7(1)  | 8(1)  |
| C(5)  | 50(1) | 51(1)  | 64(2)  | 23(1) | 6(1)  | 10(1) |
| C(6)  | 38(1) | 44(1)  | 50(1)  | 21(1) | 8(1)  | 14(1) |
| C(7)  | 39(1) | 43(1)  | 40(1)  | 15(1) | 8(1)  | 15(1) |
| C(8)  | 40(1) | 48(1)  | 41(1)  | 19(1) | 10(1) | 19(1) |
| C(9)  | 72(2) | 98(2)  | 45(1)  | 36(1) | 17(1) | 34(2) |
| C(10) | 47(1) | 47(1)  | 42(1)  | 8(1)  | 5(1)  | 17(1) |
| C(11) | 44(1) | 42(1)  | 56(1)  | 14(1) | 11(1) | 18(1) |
| C(12) | 58(2) | 45(1)  | 89(2)  | 17(1) | 9(1)  | 7(1)  |
| C(13) | 44(1) | 45(1)  | 42(1)  | 17(1) | 11(1) | 18(1) |
| C(14) | 56(1) | 54(1)  | 43(1)  | 23(1) | 8(1)  | 17(1) |
| C(15) | 54(1) | 36(1)  | 33(1)  | 12(1) | 4(1)  | 8(1)  |
| C(16) | 61(1) | 47(1)  | 40(1)  | 20(1) | 10(1) | 12(1) |
| C(17) | 63(1) | 41(1)  | 45(1)  | 17(1) | 6(1)  | 15(1) |
| C(18) | 51(1) | 41(1)  | 45(1)  | 10(1) | 8(1)  | 9(1)  |
| C(19) | 64(1) | 45(1)  | 45(1)  | 19(1) | 17(1) | 8(1)  |
| C(20) | 63(1) | 40(1)  | 42(1)  | 19(1) | 9(1)  | 13(1) |
| C(21) | 93(2) | 106(3) | 75(2)  | 33(2) | 41(2) | 47(2) |

Table 6. Hydrogen coordinates ( $\times 10^4$ ) and isotropic displacement parameters ( $\text{\AA}^2 \times 10^3$ ) for Y.

|  | x | y | z | U(eq) |
|--|---|---|---|-------|
|--|---|---|---|-------|

|        |       |       |       |     |
|--------|-------|-------|-------|-----|
| H(2)   | 5237  | 3133  | -803  | 77  |
| H(3)   | 6899  | 5108  | 1007  | 87  |
| H(4)   | 7085  | 5292  | 3122  | 83  |
| H(5)   | 5569  | 3537  | 3518  | 68  |
| H(9A)  | 1733  | 639   | -2278 | 102 |
| H(9B)  | 2694  | -520  | -2470 | 102 |
| H(9C)  | 3836  | 883   | -2307 | 102 |
| H(10)  | 1114  | -1657 | -1318 | 58  |
| H(12A) | -635  | -3372 | -857  | 104 |
| H(12B) | -1059 | -2945 | 559   | 104 |
| H(12C) | 628   | -3537 | 244   | 104 |
| H(14A) | 4579  | 1836  | 3996  | 60  |
| H(14B) | 3624  | 542   | 4141  | 60  |
| H(16)  | 1801  | 2895  | 3278  | 59  |
| H(17)  | -500  | 3809  | 4094  | 61  |
| H(19)  | -595  | 1961  | 6497  | 63  |
| H(20)  | 1670  | 1014  | 5631  | 58  |
| H(21A) | -3337 | 2477  | 6615  | 132 |
| H(21B) | -3775 | 3877  | 7054  | 132 |
| H(21C) | -1839 | 3786  | 7626  | 132 |

---

Table 7. Hydrogen bonds for Y [A and deg.].

---

| D-H...A | d(D-H) | d(H...A) | d(D...A) | <(DHA) |
|---------|--------|----------|----------|--------|
|---------|--------|----------|----------|--------|
